# Supplementary material for: Accelerated Bergman cyclization of porphyrinic-enediynesElectronic supplementary information (ESI) available: syntheses, characterization of 2a–4b, crystallographic files (CCDC 200680–200685) in CIF format. See http://www.rsc.org/suppdata/cc/b2/b212923j/
Source: Royal Society of Chemistry journal article supplement (doi:10.1039/b212923j), 2003-03-05
Supplement: b212923j.doc [file b212923j.doc]

### **Supporting Information Accompanying:**

Accelerated Bergman Cyclization of Porphyrinic- Enediynes

**Mahendra Nath, John C. Huffman, and Jeffrey M. Zaleski***

*Department of Chemistry, Indiana University, Bloomington, IN 47405*

Synthesis and Characterization of **2a** – **4b**

**Figure 1S**.

Table 1S. Summary of Crystal Data for **2a**.

Table 2S. Fractional Coordinates for **2a**.

Table 3S. Anisotropic Thermal Parameters for **2a**.

Table 4S. Bond Lengths for **2a**.

Table 5S. Bond Angles for **2a**.

**Figure 2S.**

Table 6S. Summary of Crystal Data for **2b**.

Table 7S. Fractional Coordinates for **2b**.

Table 8S. Anisotropic Thermal Parameters for **2b**.

Table 9S. Bond Lengths for **2b**.

Table 10S. Bond Angles for **2b**.

**Figure 3S.**

Table 11S. Summary of Crystal Data for **3a**.

Table 12S. Fractional Coordinates for **3a**.

Table 13S. Anisotropic Thermal Parameters for **3a**.

Table 14S. Bond Lengths for **3a**.

Table 15S. Bond Angles for **3a**.

**Figure 4S**.

Table 16S. Summary of Crystal Data for **3b**.

Table 17S. Fractional Coordinates for **3b**.

Table 18S. Anisotropic Thermal Parameters for **3b**.

Table 19S. Bond Lengths for **3b**.

Table 20S. Bond Angles for **3b**.

**Figure 5S.**

Table 21S. Summary of Crystal Data for **4a**.

Table 22S. Fractional Coordinates for **4a**.

Table 23S. Anisotropic Thermal Parameters for **4a**.

Table 24S. Bond Lengths for **4a**.

Table 25S. Bond Angles for **4a**.

**Figure 6S.**

Table 26S. Summary of Crystal Data for **4b**.

Table 27S. Fractional Coordinates for **4b**.

Table 28S. Anisotropic Thermal Parameters for **4b**.

Table 29S. Bond Lengths for **4b**.

Table 30S. Bond Angles for **4b**.

### **Syntheses**

**(2,3-Diethynyl-5,10,15,20-tetraphenylporphyrin)nickel(II) (2a).** To (Ph3P)4Pd (0.15 g, 0.13 mmol), a solution of (2,3-dibromo-5,10,15,20-tetraphenylporphyrin)nickel(II) (1.0 g, 1.21 mmol) in dry THF (20 mL) was added through a cannula under nitrogen. After stirring for 10 min, a solution of trimethyl(trimethylstannanylethynyl)silane (0.95 g, 3.64 mmol) in THF (10mL) was added at room temperature. The reaction mixture was allowed to stir at 75 C for 6 h. After completion of the reaction, the solvent was removed under reduced pressure and the resulting material was purified by silica gel column chromatography (25% CH2Cl2 in hexane) and recrystallized. The solid was then stirred with K2CO3 (1.50 g, 10.87 mmol) in a mixture of MeOH (65 mL), water (1.5 mL) and THF (125 mL) at room temperature for 12 h. After workup, the crude product was purified on silica gel column (20% CH2Cl2 in hexane) to afford **2a** in 75% yield. UV-Vis (CH2Cl2): max  (  10-4) = 429 (20.08), 542 (1.50), 583 (1.08), 627 (0.64). IR data (KBr, cm-1): 3276, 3024, 2094, 1947, 1597, 1440, 1345, 1175, 1069, 1010, 795, 697.  1H NMR (CDCl3): 3.50 (s, 2H, CH), 7.56 (dd, J = 7.2, 8.0 Hz, 4H, meso-ArH), 7.64-7.69 (m, 8H, meso-ArH), 7.85 (dd, J = 1.2, 8.0 Hz, 4H, meso-ArH), 7.96 (dd, J = 1.6, 9.2 Hz, 4H, meso-ArH), 8.65 (d, J = 5.2 Hz, 2H, -pyrrolic-H), 8.69 (s, 2H, -pyrrolic-H), 8.77 (d, J = 4.8 Hz, 2H, -pyrrolic-H). 13C NMR (CDCl3): 77.04, 89.85, 118.64, 119.10, 126.75, 127.02, 127.88, 128.21, 131.12, 132.38, 132.75, 133.35, 133.60, 139.23, 140.18, 140.22, 143.09, 143.17, 143.46. FD-MS: m/z 719 (M+). Analysis calcd. for C48H28N4Ni: C, 80.13%; H, 3.92%; N, 7.78%. Found: C, 79.85%; H, 4.07%; N, 7.69%.

**2,3-Diethynyl-5,10,15,20-tetraphenylporphyrin (2b).** To a mixture of 2,3-dibromo-5,10,15,20-tetraphenylporphyrin (2.0 g, 2.59 mmol) and (Ph3P)4Pd (0.30 g, 0.26 mmol) in dry THF (40 mL), trimethyl(trimethylstannanylethynyl)silane (2.03 g, 7.8 mmol) was added at room temperature and the reaction mixture was stirred at 75C for 5 h under nitrogen. After completion of the reaction, the solvent was removed under reduced pressure and residue was purified on an activated neutral aluminum oxide column (30% CH2Cl2 in hexane) and evaporated to dryness. The resulting solid was dissolved in THF (96 mL) and a TBAF (7.7 mL of 1.0 M solution in THF) was added dropwise at room temperature. The resulting green solution was stirred for 30 min. After completion of the reaction, solvent was evaporated under reduced pressure and the residue treated with distilled water (100 mL). The desired product was then extracted with dichloromethane (3  60 mL). The organic layer was subsequently dried over sodium sulfate and evaporated to dryness. The crude solid was purified on an activated neutral aluminum oxide column (30% EtOAc in hexane) to give **2b** in 87% yield. UV-Vis (CH2Cl2): max  (  10-4) = 431 (44.68), 525 (3.06), 560 (0.76), 604 (0.89), 663 (1.13). IR data (KBr, cm-1): 3280, 3053, 1955, 1596, 1440, 1344, 1176, 1073, 1001, 878, 799, 750, 698. 1H NMR (CDCl3): 3.59 (s, 2H, CH), 7.68 (dd, J = 7.2, 8.0 Hz, 4H, meso-ArH), 7.75-7.82 (m, 8H, meso-ArH), 8.10 (dd, J = 1.2, 8.0 Hz, 4H, meso-ArH), 8.20 (dd, J = 1.6, 9.2 Hz, 4H, meso-ArH), 8.73 (s, 2H, -pyrrolic-H), 8.87 (d, J = 5.2 Hz, 2H, -pyrrolic-H), 8.90 (d, J = 4.8 Hz, 2H, -pyrrolic-H). FD-MS: m/z 662 (M+). Analysis calcd. for C48H30N4.1.5H2O: C, 83.58%; H, 4.38%; N, 8.12%. Found: C, 83.84%; H, 4.43%; N, 7.89%.

**(10,15-Diphenyl-piceno[20,1,2,3,4,5-fghij]porphyrin)nickel(II) (3a).** To a mixture of **2a** (0.05 g, 0.07 mmol) and methanol (1.25 mL) in chloroform (2.5 mL), DDQ (0.033 g, 0.15 mmol) was added at room temperature and stirred for 30 min. The solvent was evaporated under reduced pressure at room temperature and residue was purified on activated neutral alumina (30% CH2Cl2 in hexane) to afford the title compound in 30% yield. UV-Vis (CH2Cl2): max  (  10-4) = 450 (13.40), 538 (0.39), 582 (0.50), 630 (2.19). 1H NMR (CDCl3): 7.70-7.75 (m, 6H), 7.84 (t, J = 7.2 Hz, 2H), 7.97 (dd, J = 6.8, 7.2 Hz, 2H), 8.07 (dd, J = 1.6, 7.6 Hz, 4H), 8.49 (s, 2H, -pyrrolic-H), 8.88 (d, J = 4.8 Hz, 2H, -pyrrolic-H), 9.07 (d, J = 8.0 Hz, 2H), 9.16 (s, 2H), 9.40 (d, J = 8.0 Hz, 2H), 9.65 (d, J = 4.8 Hz, 2H, -pyrrolic-H). FAB-HRMS calcd. for C48H27N4Ni (MH+): 717.1589. Found: 717.1587.

**10,15-Diphenyl-piceno[20,1,2,3,4,5-fghij]porphyrin (3b).** To a mixture of **2b** (0.05 g, 0.08 mmol) and methanol (1.25 mL) in chloroform (2.5 mL), DDQ (0.026 g, 0.12 mmol) was added at room temperature and stirred for 30 min. The solvent was evaporated under reduced pressure at room temperature and residue was purified on activated neutral alumina (CH2Cl2) to afford **3b** in 40% yield. UV-Vis (CH2Cl2): max  (  10-4) = 459 (12.04), 600 (0.70), 622 (1.10), 649 (2.45), 684 (1.47). 1H NMR (CDCl3): 7.76-7.78 (m, 8H), 7.92 (t, J = 7.2 Hz, 2H), 8.26-8.28 (m, 4H), 8.63 (s, 2H, -pyrrolic-H), 8.83 (d, J = 4.4 Hz, 2H, -pyrrolic-H), 8.91 (d, J = 8.0 Hz, 2H), 8.93 (s, 2H), 9.56 (d, J = 8.0 Hz, 2H), 9.60 (d, J = 4.4 Hz, 2H, -pyrrolic-H). FAB-HRMS calcd. for C48H29N4 (MH+): 661.2392. Found: 661.2390.

**(2,3-Bis(trimethylsilylethynyl)-5,10,15,20-tetraphenylporphyrin)nickel(II) (4a).** Compound **4a** was obtained in 90% yield as a precursor to **2a**. UV-Vis (CH2Cl2): max  (  10-4) = 433 (32.77), 544 (2.44), 589 (2.11). IR (KBr, cm-1): 2959, 2136, 1598, 1441, 1384, 1244, 1176, 1073, 1005, 899, 832, 795, 648, 628. 1H NMR (CDCl3): 0.20 (s, 18H, (CH3)3Si), 7.61 (dd, J = 7.2, 7.6 Hz, 4H, meso-ArH), 7.67-7.71 (m, 8H, meso-ArH), 7.90 (dd, J = 1.2, 8.0 Hz, 4H, meso-ArH), 7.99 (dd, J = 2.4, 9.6 Hz, 4H, meso-ArH), 8.61-8.63 (m, 4H, -pyrrolic-H), 8.67 (s, 2H, -pyrrolic-H). 13C NMR (CDCl3): 0.75, 98.51, 109.50, 118.76, 119.02, 126.83, 127.00, 127.84, 128.40, 132.10, 132.19, 132.47, 133.32, 133.67, 133.95, 139.23, 140.15, 140.27, 143.18, 143.33, 143.69. FD-MS: m/z 864 (M+). Analysis calcd. for C54H44N4NiSi2: C, 75.08%; H, 5.13%; N, 6.49%. Found: C, 74.87%; H, 4.93%; N, 6.25%.

**2,3-Bis(trimethylsilylethynyl)-5,10,15,20-tetraphenylporphyrin (4b).** Compound **4b** was isolated in 92% yield as a precursor to **2b**. UV-Vis (CH2Cl2): max  (  10-4) = 435 (38.94), 527 (2.85), 564 (0.77), 610 (0.79), 669 (0.94). IR data (KBr, cm-1): 3342, 2134, 1596, 1442, 1386, 1245, 1175, 1073, 1000, 900, 801, 655, 628. 1H NMR (CDCl3): 0.22 (s, 18H, (CH3)3Si), 7.71-7.76 (m, 12H, meso-ArH), 8.17-8.19 (m, 8H, meso-ArH), 8.69 (s, 2H, -pyrrolic-H), 8.77 (d, J = 5.1 Hz, 2H, -pyrrolic-H), 8.81 (d, J = 5.1 Hz, 2H, -pyrrolic-H). FD-MS: m/z 806 (M+). Analysis calcd. for C54H46N4Si2.H2O: C, 78.64%; H, 5.77%; N, 6.79%. Found: C, 78.93%; H, 5.66%; N, 6.94%.

**Figure 1S**.

**Table 1S. Summary of Crystal Data for 2a.**

| Formula | C48H28N4Ni |
| --- | --- |
| Formula Weight | 719.45 |
| Color of Crystal | Reddish-orange |
| Crystal System | Monoclinic |
| Space Group | P 2(1)/c |
| *a*, Å | 24.5972(12) |
| *b*, Å | 10.4576(5) |
| *c*, Å | 13.3721(6) |
| , deg. | 90 |
| , deg. | 94.1010(10) |
| , deg. | 90 |
| *V*, Å3 | 3430.9(3) |
| ** | 4 |
| **calcd, g/cm3 | 1.393 |
| T, K | 114(2) |
| **Å | .71073 |
| R(Fo)a | 0.0538 |
| Rw(Fo)b | 0.1409 |

**Comments:** Packing causes the alkyne carbon atoms C27 and C29 to point toward the hydrogen atoms on C15 and C16 of an adjacent molecule. As a result there is a disorder with the alkyne being located on either side of the molecule, i.e. attached also to C15 and C16. . The final model assumed 50% occupancy for the eight carbon atoms involved in the disorder. This disorder also causes a shift in the phenyl ring defined by C42-C47 with an alternate position rotated 18.5 degrees dependent on which side of the molecule the alkyne lies.

**Table 2S**. Fractional Coordinates for **2a**.

Atom x y z Uiso

Ni(1) 2438(1) 9782(1) 2791(1) 30(1)

N(2) 3114(1) 9627(2) 3582(2) 28(1)

C(3) 3318(1) 10490(3) 4298(2) 31(1)

C(4) 3878(1) 10196(3) 4588(2) 36(1)

C(5) 4000(1) 9084(3) 4114(2) 32(1)

C(6) 3528(1) 8760(3) 3467(2) 29(1)

C(7) 3507(1) 7788(3) 2748(2) 29(1)

C(8) 3124(1) 7811(3) 1939(2) 32(1)

C(9) 3159(1) 7075(3) 1035(2) 36(1)

C(10) 2803(1) 7569(3) 344(3) 38(1)

C(11) 2510(1) 8552(3) 823(2) 33(1)

N(12) 2712(1) 8693(2) 1802(2) 30(1)

C(13) 2061(1) 9182(3) 372(2) 34(1)

C(14) 1694(1) 9821(3) 946(2) 36(1)

C(15) 1154(2) 10168(4) 601(3) 49(1)

C(16) 891(2) 10509(5) 1422(3) 60(1)

C(17) 1284(2) 10420(4) 2266(3) 49(1)

N(18) 1775(1) 10015(2) 1970(2) 35(1)

C(19) 1180(2) 10755(5) 3251(3) 58(1)

C(20) 1607(2) 10975(4) 3960(3) 45(1)

C(21) 1560(2) 11647(4) 4891(3) 56(1)

C(22) 2067(2) 11939(4) 5269(3) 47(1)

C(23) 2440(1) 11375(3) 4604(2) 37(1)

N(24) 2152(1) 10787(3) 3813(2) 37(1)

C(25) 2997(1) 11355(3) 4783(2) 33(1)

C(26) 4255(3) 11068(6) 5103(4) 33(2)

C(27) 4579(3) 11817(7) 5537(6) 46(2)

C(28) 4520(3) 8535(5) 4182(4) 27(1)

C(29) 4965(3) 8023(6) 4286(5) 34(2)

C(30) 3945(1) 6798(3) 2809(2) 30(1)

C(31) 3984(2) 5957(3) 3614(3) 42(1)

C(32) 4401(2) 5055(4) 3698(3) 54(1)

C(33) 4774(2) 4991(4) 2981(3) 52(1)

C(34) 4737(2) 5819(4) 2177(3) 44(1)

C(35) 4328(1) 6718(3) 2087(3) 35(1)

C(36) 1961(1) 9132(4) -747(2) 41(1)

C(37) 1730(2) 8113(5) -1241(4) 71(1)

C(38) 1667(3) 8148(7) -2311(4) 85(2)

C(39) 1826(2) 9159(7) -2811(4) 83(2)

C(40) 2051(3) 10203(8) -2316(4) 107(2)

C(41) 2118(2) 10166(6) -1292(3) 75(2)

C(42) 555(8) 10670(20) 3522(13) 57(5)

C(43) 339(7) 11766(19) 3735(12) 96(7)

C(44) -307(4) 11774(13) 3963(6) 133(5)

C(45) -516(7) 10700(40) 3994(10) 173(16)

C(46) -280(4) 9481(16) 3743(6) 90(4)

C(47) 287(5) 9444(13) 3491(8) 59(3)

C(48) 3264(1) 12199(3) 5577(2) 36(1)

C(49) 3383(2) 13453(3) 5358(3) 36(1)

C(50) 3659(2) 14229(4) 6056(3) 43(1)

C(51) 3804(2) 13763(4) 6994(3) 49(1)

C(52) 3671(2) 12541(4) 7240(3) 71(2)

C(53) 3394(2) 11749(4) 6545(3) 63(1)

C(54A) 909(4) 10041(10) -371(7) 75(3)

C(55A) 660(4) 9869(15) -1213(7) 107(5)

C(56A) 360(4) 10970(13) 1389(6) 92(4)

C(57A) -120(6) 11347(19) 1287(9) 157(8)

C(58A) 662(7) 11255(18) 3487(13) 54(5)

C(59A) 513(7) 12547(14) 3662(12) 77(5)

C(60A) -37(5) 12802(14) 3929(8) 86(4)

C(61A) -315(8) 10532(18) 3792(12) 91(5)

C(62A) 273(6) 10276(16) 3529(9) 60(3)

H(63) 337(1) 630(3) 97(2) 45(10)

H(64) 270(1) 726(3) -36(3) 48(10)

H(65) 119(2) 1179(4) 522(3) 55(11)

H(66) 224(2) 1238(4) 599(3) 65(12)

H(67) 368(1) 595(3) 403(2) 40(10)

H(68) 441(2) 457(4) 428(3) 64(13)

H(69) 502(2) 452(4) 303(3) 55(13)

H(70) 497(1) 581(3) 170(2) 33(9)

H(71) 432(1) 738(3) 152(2) 37(9)

H(72) 159(1) 746(3) -86(3) 38(10)

H(73) 150(3) 752(6) -251(5) 130(30)

H(74) 190(2) 926(6) -353(5) 140(20)

H(75) 226(3) 1085(7) -293(5) 160(20)

H(76) 230(2) 1084(4) -95(3) 79(15)

H(77) 331(1) 1367(3) 475(3) 41(10)

H(78) 374(2) 1507(4) 590(3) 53(12)

H(79) 399(1) 1428(4) 748(3) 46(10)

H(80) 376(2) 1220(4) 794(3) 80(14)

H(81) 330(2) 1097(4) 672(3) 54(12)

**Table 3S**. Anisotropic Thermal Parameters for **2a**.

Atom U11 U22 U33 U23 U13 U12

Ni(1) 34(1) 31(1) 25(1) -2(1) 6(1) 3(1)

N(2) 37(2) 26(1) 21(1) -1(1) 7(1) -1(1)

C(3) 40(2) 28(2) 24(2) 3(1) 7(1) -3(1)

C(4) 43(2) 39(2) 27(2) -2(2) 5(1) 0(2)

C(5) 39(2) 35(2) 23(2) 4(1) 5(1) 1(2)

C(6) 34(2) 26(2) 26(2) 6(1) 7(1) 0(1)

C(7) 34(2) 25(2) 30(2) -1(1) 9(1) -1(1)

C(8) 36(2) 27(2) 33(2) -3(1) 7(1) -2(1)

C(9) 39(2) 35(2) 36(2) -11(2) 4(2) 3(2)

C(10) 38(2) 41(2) 36(2) -12(2) 2(2) -2(2)

C(11) 36(2) 34(2) 29(2) -5(1) 5(1) -3(1)

N(12) 33(2) 31(1) 26(1) -2(1) 7(1) -1(1)

C(13) 38(2) 35(2) 29(2) -6(1) 6(1) -7(2)

C(14) 40(2) 37(2) 29(2) 2(1) 3(1) 2(2)

C(15) 48(2) 66(3) 34(2) -3(2) 1(2) 17(2)

C(16) 46(2) 95(3) 39(2) -6(2) 0(2) 24(2)

C(17) 43(2) 74(3) 31(2) -3(2) 1(2) 19(2)

N(18) 38(2) 40(2) 28(1) -1(1) 7(1) 7(1)

C(19) 47(2) 94(3) 34(2) -4(2) 4(2) 28(2)

C(20) 45(2) 61(3) 31(2) -2(2) 8(2) 17(2)

C(21) 55(3) 81(3) 33(2) -7(2) 14(2) 26(2)

C(22) 56(3) 54(2) 30(2) -6(2) 7(2) 15(2)

C(23) 48(2) 35(2) 27(2) 0(1) 6(2) 6(2)

N(24) 43(2) 43(2) 25(1) -1(1) 7(1) 9(1)

C(25) 48(2) 27(2) 25(2) 1(1) 5(1) 0(2)

C(26) 38(4) 38(4) 24(3) 2(3) 2(3) 15(3)

C(27) 42(5) 46(4) 49(5) -10(4) -5(4) 21(4)

C(28) 45(4) 20(3) 16(3) -3(2) 0(3) -3(3)

C(29) 37(4) 28(3) 36(4) -3(3) -7(3) -3(3)

C(30) 35(2) 26(2) 31(2) -4(1) 3(1) -2(1)

C(31) 52(2) 31(2) 46(2) 3(2) 10(2) 1(2)

C(32) 72(3) 34(2) 56(3) 9(2) 4(2) 11(2)

C(33) 51(3) 33(2) 72(3) -4(2) 3(2) 18(2)

C(34) 43(2) 41(2) 49(2) -13(2) 13(2) 3(2)

C(35) 37(2) 30(2) 39(2) -6(2) 4(2) -3(2)

C(36) 41(2) 50(2) 30(2) -6(2) 3(2) 5(2)

C(37) 101(4) 52(3) 54(3) -8(2) -23(3) 7(3)

C(38) 110(5) 72(4) 67(4) -34(3) -37(3) 41(4)

C(39) 87(4) 125(5) 37(3) 1(3) 9(3) 46(4)

C(40) 94(4) 182(7) 43(3) 20(4) -1(3) -32(4)

C(41) 85(4) 101(4) 39(2) 10(3) -2(2) -31(3)

C(42) 22(8) 118(18) 32(5) 0(9) 2(6) -9(9)

C(43) 65(11) 170(20) 50(7) -19(11) 10(7) 63(12)

C(44) 106(8) 243(16) 48(4) 2(7) 1(4) 6(7)

C(45) 65(10) 440(50) 16(5) 11(13) 4(6) 106(18)

C(46) 38(5) 210(16) 21(4) 3(6) -3(3) 12(7)

C(47) 34(6) 107(9) 35(5) 3(7) 3(4) -18(7)

C(48) 51(2) 32(2) 25(2) -2(1) 7(2) 7(2)

C(49) 51(2) 32(2) 26(2) 1(2) -2(2) 4(2)

C(50) 54(2) 36(2) 40(2) -6(2) 4(2) 0(2)

C(51) 60(3) 49(2) 37(2) -20(2) -7(2) 16(2)

C(52) 137(5) 50(3) 25(2) -7(2) -12(2) 34(3)

C(53) 129(4) 29(2) 31(2) -1(2) 0(2) 6(2)

C(54A) 56(6) 120(9) 50(5) -6(5) 13(4) 29(6)

C(55A) 63(6) 213(15) 44(5) -27(7) -2(5) 36(8)

C(56A) 76(7) 165(11) 35(5) -25(6) 2(5) 39(7)

C(57A) 96(10) 300(20) 72(8) -86(11) -29(7) 99(12)

C(58A) 25(8) 115(15) 23(5) -8(8) 7(4) -2(8)

C(59A) 69(10) 104(11) 54(7) -31(8) -23(7) 57(8)

C(60A) 58(7) 151(12) 46(6) -33(7) -12(5) 38(7)

C(62A) 39(7) 101(11) 40(5) 1(8) -1(5) -3(11)

**Table 4S**. Bond Lengths for **2a**.

A B Distance

Ni(1) N(24) 1.900(3)

Ni(1) N(12) 1.904(2)

Ni(1) N(2) 1.913(3)

Ni(1) N(18) 1.915(3)

N(2) C(6) 1.380(4)

N(2) C(3) 1.383(4)

C(3) C(25) 1.391(4)

C(3) C(4) 1.437(5)

C(4) C(5) 1.368(4)

C(4) C(26) 1.440(8)

C(5) C(28) 1.398(7)

C(5) C(6) 1.438(4)

C(6) C(7) 1.398(4)

C(7) C(8) 1.382(4)

C(7) C(30) 1.493(4)

C(8) N(12) 1.373(4)

C(8) C(9) 1.441(4)

C(9) C(10) 1.331(5)

C(10) C(11) 1.433(5)

C(11) N(12) 1.375(4)

C(11) C(13) 1.385(5)

C(13) C(14) 1.398(4)

C(13) C(36) 1.500(4)

C(14) N(18) 1.384(4)

C(14) C(15) 1.420(5)

C(15) C(16) 1.361(5)

C(15) C(54A) 1.399(10)

C(16) C(56A) 1.392(11)

C(16) C(17) 1.436(5)

C(17) N(18) 1.365(4)

C(17) C(19) 1.403(5)

C(19) C(20) 1.383(5)

C(19) C(58A) 1.43(2)

C(19) C(42) 1.608(18)

C(20) N(24) 1.382(4)

C(20) C(21) 1.441(5)

C(21) C(22) 1.347(6)

C(22) C(23) 1.448(5)

C(23) C(25) 1.374(5)

C(23) N(24) 1.376(4)

C(25) C(48) 1.496(4)

C(26) C(27) 1.232(10)

C(27) C(29)#1 1.143(9)

C(28) C(29) 1.217(9)

C(29) C(27)#1 1.143(9)

C(30) C(31) 1.388(5)

C(30) C(35) 1.399(4)

C(31) C(32) 1.392(5)

C(32) C(33) 1.375(6)

C(33) C(34) 1.379(6)

C(34) C(35) 1.376(5)

C(36) C(37) 1.356(6)

C(36) C(41) 1.374(6)

C(37) C(38) 1.430(7)

C(38) C(39) 1.325(9)

C(39) C(40) 1.372(9)

C(40) C(41) 1.368(7)

C(42) C(43) 1.30(3)

C(42) C(47) 1.44(2)

C(43) C(44) 1.64(2)

C(44) C(45) 1.23(4)

C(44) C(60A) 1.266(15)

C(44) C(61A) 1.319(19)

C(45) C(46) 1.45(4)

C(46) C(47) 1.458(16)

C(48) C(49) 1.381(5)

C(48) C(53) 1.392(5)

C(49) C(50) 1.378(5)

C(50) C(51) 1.369(5)

C(51) C(52) 1.365(6)

C(52) C(53) 1.387(6)

C(54A) C(55A) 1.256(13)

C(55A) C(57A)#2 1.84(2)

C(56A) C(57A) 1.243(14)

C(57A) C(55A)#2 1.84(2)

C(58A) C(62A) 1.405(19)

C(58A) C(59A) 1.42(3)

C(59A) C(60A) 1.45(2)

C(61A) C(62A) 1.53(2)

**Table 5S**. Bond Angles for **2a**.

A B C Angle

N(24) Ni(1) N(12) 176.85(12)

N(24) Ni(1) N(2) 90.05(11)

N(12) Ni(1) N(2) 89.83(10)

N(24) Ni(1) N(18) 89.86(11)

N(12) Ni(1) N(18) 90.41(11)

N(2) Ni(1) N(18) 177.10(11)

C(6) N(2) C(3) 105.8(3)

C(6) N(2) Ni(1) 127.8(2)

C(3) N(2) Ni(1) 125.8(2)

N(2) C(3) C(25) 123.9(3)

N(2) C(3) C(4) 109.9(3)

C(25) C(3) C(4) 125.3(3)

C(5) C(4) C(3) 107.1(3)

C(5) C(4) C(26) 127.2(4)

C(3) C(4) C(26) 124.4(4)

C(4) C(5) C(28) 123.3(4)

C(4) C(5) C(6) 106.5(3)

C(28) C(5) C(6) 129.5(3)

N(2) C(6) C(7) 124.2(3)

N(2) C(6) C(5) 110.4(3)

C(7) C(6) C(5) 125.1(3)

C(8) C(7) C(6) 121.0(3)

C(8) C(7) C(30) 120.3(3)

C(6) C(7) C(30) 118.4(3)

N(12) C(8) C(7) 124.9(3)

N(12) C(8) C(9) 109.5(3)

C(7) C(8) C(9) 124.7(3)

C(10) C(9) C(8) 107.5(3)

C(9) C(10) C(11) 107.1(3)

N(12) C(11) C(13) 125.9(3)

N(12) C(11) C(10) 110.1(3)

C(13) C(11) C(10) 123.9(3)

C(8) N(12) C(11) 105.6(2)

C(8) N(12) Ni(1) 127.1(2)

C(11) N(12) Ni(1) 127.1(2)

C(11) C(13) C(14) 121.0(3)

C(11) C(13) C(36) 119.1(3)

C(14) C(13) C(36) 119.8(3)

N(18) C(14) C(13) 124.0(3)

N(18) C(14) C(15) 110.5(3)

C(13) C(14) C(15) 124.7(3)

C(16) C(15) C(54A) 125.1(5)

C(16) C(15) C(14) 106.9(3)

C(54A) C(15) C(14) 127.5(5)

C(15) C(16) C(56A) 124.4(5)

C(15) C(16) C(17) 106.6(3)

C(56A) C(16) C(17) 128.7(5)

N(18) C(17) C(19) 125.0(3)

N(18) C(17) C(16) 110.5(3)

C(19) C(17) C(16) 124.4(3)

C(17) N(18) C(14) 105.3(3)

C(17) N(18) Ni(1) 127.4(2)

C(14) N(18) Ni(1) 127.3(2)

C(20) C(19) C(17) 120.3(3)

C(20) C(19) C(58A) 115.5(8)

C(17) C(19) C(58A) 121.5(8)

C(20) C(19) C(42) 123.1(7)

C(17) C(19) C(42) 116.1(7)

C(58A) C(19) C(42) 24.4(10)

N(24) C(20) C(19) 125.1(3)

N(24) C(20) C(21) 109.3(3)

C(19) C(20) C(21) 124.7(3)

C(22) C(21) C(20) 107.8(3)

C(21) C(22) C(23) 106.7(3)

C(25) C(23) N(24) 125.4(3)

C(25) C(23) C(22) 124.6(3)

N(24) C(23) C(22) 109.8(3)

C(23) N(24) C(20) 106.2(3)

C(23) N(24) Ni(1) 127.1(2)

C(20) N(24) Ni(1) 126.5(2)

C(23) C(25) C(3) 121.4(3)

C(23) C(25) C(48) 119.6(3)

C(3) C(25) C(48) 118.7(3)

C(27) C(26) C(4) 179.4(7)

C(29)#1 C(27) C(26) 141.6(8)

C(29) C(28) C(5) 176.5(6)

C(27)#1 C(29) C(28) 145.2(7)

C(31) C(30) C(35) 119.0(3)

C(31) C(30) C(7) 119.5(3)

C(35) C(30) C(7) 121.5(3)

C(30) C(31) C(32) 120.1(4)

C(33) C(32) C(31) 120.1(4)

C(32) C(33) C(34) 120.2(4)

C(35) C(34) C(33) 120.3(4)

C(34) C(35) C(30) 120.3(3)

C(37) C(36) C(41) 119.0(4)

C(37) C(36) C(13) 123.1(4)

C(41) C(36) C(13) 117.9(3)

C(36) C(37) C(38) 118.6(5)

C(39) C(38) C(37) 120.7(6)

C(38) C(39) C(40) 121.0(5)

C(41) C(40) C(39) 118.4(6)

C(40) C(41) C(36) 122.3(5)

C(43) C(42) C(47) 126.6(18)

C(43) C(42) C(19) 114.5(16)

C(47) C(42) C(19) 118.8(15)

C(42) C(43) C(44) 117.5(17)

C(45) C(44) C(60A) 172.9(19)

C(45) C(44) C(61A) 27.3(10)

C(60A) C(44) C(61A) 146.2(16)

C(45) C(44) C(43) 114.4(18)

C(60A) C(44) C(43) 58.6(9)

C(61A) C(44) C(43) 88.0(15)

C(44) C(45) C(46) 128.1(17)

C(45) C(46) C(47) 118.8(17)

C(42) C(47) C(46) 114.3(14)

C(49) C(48) C(53) 118.7(3)

C(49) C(48) C(25) 119.9(3)

C(53) C(48) C(25) 121.4(3)

C(50) C(49) C(48) 121.2(3)

C(51) C(50) C(49) 119.6(4)

C(52) C(51) C(50) 120.2(4)

C(51) C(52) C(53) 120.8(4)

C(52) C(53) C(48) 119.4(4)

C(55A) C(54A) C(15) 175.4(12)

C(54A) C(55A) C(57A)#2 116.8(11)

C(57A) C(56A) C(16) 175.2(9)

C(56A) C(57A) C(55A)#2 117.7(15)

C(62A) C(58A) C(59A) 120.0(17)

C(62A) C(58A) C(19) 111.2(16)

C(59A) C(58A) C(19) 128.7(12)

C(58A) C(59A) C(60A) 118.1(14)

C(44) C(60A) C(59A) 110.8(12)

C(44) C(61A) C(62A) 102.1(16)

C(58A) C(62A) C(61A) 122.5(17)

**Figure 2S**.

**Table 6S. Summary of Crystal Data for 2b.**

| Formula | C48H30N4 |
| --- | --- |
| Formula Weight | 662.76 |
| Color of Crystal | black |
| Crystal System | Monoclinic |
| Space Group | P 21/N |
| *a*, Å | 14.4177(5) |
| *b*, Å | 10.0068(4) |
| *c*, Å | 23.8356(9) |
| , deg. | 90 |
| , deg. | 97.5350(10) |
| , deg. | 90 |
| *V*, Å3 | 3409.18 |
| ** | 4 |
| **calcd, g/cm3 | 1.291 |
| T, K | 114 |
| **Å | .71073 |
| R(Fo)a | 0.050 |
| Rw(Fo)b | 0.122 |

**Table 7S**. Fractional Coordinates for **2b**.

Atom x y z Uiso

N(1) 5074(1) 9202(1) 1052(1) 23(1)

C(2) 4437(1) 8636(1) 646(1) 22(1)

C(3) 3486(1) 8866(1) 774(1) 23(1)

C(4) 3568(1) 9648(1) 1251(1) 23(1)

C(5) 4573(1) 9811(1) 1429(1) 23(1)

C(6) 4958(1) 10466(1) 1929(1) 24(1)

C(7) 5911(1) 10544(1) 2137(1) 24(1)

C(8) 6301(1) 11248(2) 2635(1) 29(1)

C(9) 7251(1) 11126(2) 2690(1) 28(1)

C(10) 7480(1) 10319(1) 2229(1) 24(1)

N(11) 6651(1) 9990(1) 1907(1) 24(1)

C(12) 8380(1) 9976(1) 2114(1) 23(1)

C(13) 8578(1) 9313(1) 1621(1) 23(1)

C(14) 9518(1) 8921(2) 1523(1) 26(1)

C(15) 9436(1) 8381(2) 1002(1) 27(1)

C(16) 8443(1) 8432(1) 778(1) 24(1)

N(17) 7934(1) 8978(1) 1169(1) 23(1)

C(18) 8082(1) 7983(1) 235(1) 23(1)

C(19) 7128(1) 7902(1) 27(1) 23(1)

C(20) 6731(1) 7433(1) -519(1) 25(1)

C(21) 5782(1) 7407(1) -531(1) 25(1)

C(22) 5562(1) 7874(1) 3(1) 22(1)

N(23) 6396(1) 8188(1) 324(1) 23(1)

C(24) 4660(1) 7988(1) 157(1) 22(1)

C(25) 2597(1) 8352(2) 493(1) 32(1)

C(26) 1894(1) 7938(2) 316(1) 45(1)

C(27) 2768(1) 10200(2) 1485(1) 29(1)

C(28) 2100(1) 10613(2) 1622(1) 38(1)

C(29) 4314(1) 11112(2) 2292(1) 25(1)

C(30) 4045(1) 10425(2) 2753(1) 32(1)

C(31) 3432(1) 11016(2) 3083(1) 37(1)

C(32) 3102(1) 12288(2) 2965(1) 35(1)

C(33) 3377(1) 12992(2) 2515(1) 34(1)

C(34) 3984(1) 12406(2) 2178(1) 29(1)

C(35) 9179(1) 10404(1) 2540(1) 25(1)

C(36) 9856(1) 11294(2) 2391(1) 30(1)

C(37) 10602(1) 11686(2) 2785(1) 35(1)

C(38) 10674(1) 11220(2) 3336(1) 34(1)

C(39) 9992(1) 10385(2) 3492(1) 34(1)

C(40) 9256(1) 9959(2) 3099(1) 29(1)

C(41) 8752(1) 7516(2) -153(1) 25(1)

C(42) 8819(1) 6169(2) -283(1) 36(1)

C(43) 9446(1) 5742(2) -643(1) 41(1)

C(44) 10002(1) 6661(2) -876(1) 40(1)

C(45) 9941(1) 7991(2) -750(1) 38(1)

C(46) 9316(1) 8429(2) -391(1) 32(1)

C(47) 3905(1) 7354(1) -249(1) 22(1)

C(48) 3369(1) 8091(2) -666(1) 32(1)

C(49) 2682(1) 7475(2) -1041(1) 34(1)

C(50) 2532(1) 6115(2) -1008(1) 31(1)

C(51) 3068(1) 5373(2) -599(1) 34(1)

C(52) 3750(1) 5986(2) -219(1) 30(1)

H(53) 593(1) 1170(2) 289(1) 35(4)

H(54) 773(1) 1154(2) 300(1) 29(4)

H(55) 659(1) 949(2) 159(1) 52(6)

H(56) 1008(1) 900(2) 181(1) 32(4)

H(57) 996(1) 801(2) 79(1) 27(4)

H(58) 711(1) 720(2) -82(1) 31(4)

H(59) 531(1) 720(1) -85(1) 21(4)

H(60) 645(1) 845(2) 68(1) 48(6)

H(61) 128(2) 760(2) 12(1) 77(7)

H(62) 150(2) 1111(3) 176(1) 106(9)

H(63) 427(1) 955(2) 282(1) 32(4)

H(64) 327(1) 1051(2) 340(1) 46(5)

H(65) 269(1) 1271(2) 321(1) 41(5)

H(66) 314(1) 1392(2) 241(1) 44(5)

H(67) 417(1) 1291(2) 187(1) 39(5)

H(68) 980(1) 1163(2) 200(1) 34(4)

H(69) 1107(1) 1228(2) 265(1) 43(5)

H(70) 1121(1) 1148(2) 362(1) 34(4)

H(71) 1002(1) 1011(2) 388(1) 52(6)

H(72) 883(1) 935(2) 321(1) 40(5)

H(73) 844(1) 552(2) -12(1) 41(5)

H(74) 953(1) 479(2) -70(1) 56(6)

H(75) 1041(1) 633(2) -114(1) 49(5)

H(76) 1032(1) 867(2) -92(1) 51(5)

H(77) 925(1) 941(2) -32(1) 43(5)

H(78) 347(1) 908(2) -69(1) 51(5)

H(79) 228(1) 803(2) -132(1) 57(6)

H(80) 204(1) 569(2) -129(1) 30(4)

H(81) 297(1) 442(2) -58(1) 45(5)

H(82) 414(1) 549(2) 8(1) 44(5)

**Table 8S**. Anisotropic Thermal Parameters for **2b**.

Atom U11 U22 U33 U23 U13 U12

N(1) 23(1) 24(1) 22(1) 1(1) 5(1) 2(1)

C(2) 21(1) 22(1) 23(1) 5(1) 4(1) 2(1)

C(3) 22(1) 24(1) 24(1) 4(1) 4(1) 3(1)

C(4) 22(1) 23(1) 25(1) 4(1) 4(1) 1(1)

C(5) 21(1) 23(1) 25(1) 3(1) 6(1) 1(1)

C(6) 22(1) 25(1) 24(1) 1(1) 6(1) 2(1)

C(7) 23(1) 27(1) 24(1) 0(1) 5(1) 3(1)

C(8) 26(1) 32(1) 28(1) -5(1) 5(1) 3(1)

C(9) 25(1) 33(1) 26(1) -5(1) 3(1) 2(1)

C(10) 22(1) 27(1) 23(1) 1(1) 3(1) 1(1)

N(11) 20(1) 29(1) 23(1) -2(1) 3(1) 3(1)

C(12) 21(1) 26(1) 23(1) 3(1) 3(1) 1(1)

C(13) 20(1) 25(1) 24(1) 4(1) 4(1) 2(1)

C(14) 21(1) 32(1) 25(1) 3(1) 3(1) 3(1)

C(15) 21(1) 32(1) 27(1) 2(1) 5(1) 3(1)

C(16) 22(1) 25(1) 25(1) 3(1) 5(1) 2(1)

N(17) 23(1) 25(1) 22(1) 1(1) 5(1) 3(1)

C(18) 23(1) 23(1) 23(1) 3(1) 6(1) 4(1)

C(19) 25(1) 22(1) 23(1) 3(1) 5(1) 3(1)

C(20) 28(1) 28(1) 22(1) 2(1) 5(1) 2(1)

C(21) 27(1) 25(1) 22(1) 1(1) 3(1) 1(1)

C(22) 25(1) 21(1) 22(1) 2(1) 4(1) 2(1)

N(23) 22(1) 25(1) 21(1) 0(1) 4(1) 3(1)

C(24) 24(1) 21(1) 22(1) 4(1) 2(1) 1(1)

C(25) 39(1) 31(1) 29(1) -2(1) 13(1) 4(1)

C(26) 36(1) 62(1) 36(1) -9(1) 6(1) 12(1)

C(27) 37(1) 26(1) 24(1) 0(1) 1(1) -7(1)

C(28) 33(1) 42(1) 38(1) 2(1) -1(1) -4(1)

C(29) 18(1) 32(1) 24(1) -4(1) 2(1) 1(1)

C(30) 31(1) 35(1) 31(1) 1(1) 8(1) 4(1)

C(31) 34(1) 47(1) 32(1) -2(1) 13(1) -2(1)

C(32) 23(1) 46(1) 37(1) -13(1) 8(1) -1(1)

C(33) 26(1) 34(1) 40(1) -8(1) 2(1) 4(1)

C(34) 25(1) 33(1) 30(1) -3(1) 4(1) 0(1)

C(35) 21(1) 28(1) 25(1) -1(1) 3(1) 3(1)

C(36) 28(1) 36(1) 28(1) 1(1) 5(1) -1(1)

C(37) 29(1) 36(1) 39(1) -6(1) 5(1) -6(1)

C(38) 30(1) 37(1) 33(1) -12(1) -2(1) 1(1)

C(39) 41(1) 36(1) 24(1) -3(1) 0(1) 5(1)

C(40) 27(1) 32(1) 27(1) 1(1) 5(1) 1(1)

C(41) 21(1) 34(1) 21(1) 1(1) 4(1) 5(1)

C(42) 34(1) 35(1) 39(1) 1(1) 12(1) 6(1)

C(43) 43(1) 43(1) 40(1) -7(1) 10(1) 12(1)

C(44) 29(1) 62(1) 29(1) -4(1) 7(1) 10(1)

C(45) 30(1) 56(1) 29(1) 4(1) 11(1) -1(1)

C(46) 29(1) 39(1) 29(1) 1(1) 7(1) 1(1)

C(47) 22(1) 24(1) 23(1) 1(1) 6(1) 0(1)

C(48) 40(1) 25(1) 30(1) 4(1) -4(1) -5(1)

C(49) 36(1) 35(1) 29(1) 4(1) -4(1) -2(1)

C(50) 25(1) 36(1) 33(1) -7(1) 8(1) -5(1)

C(51) 32(1) 23(1) 49(1) -1(1) 9(1) -3(1)

C(52) 28(1) 25(1) 38(1) 7(1) 5(1) 3(1)

**Table 9S**. Bond Lengths for **2b**.

A B Distance

N(1) C(2) 1.3667(17)

N(1) C(5) 1.3668(17)

C(2) C(24) 1.4073(18)

C(2) C(3) 1.4621(18)

C(3) C(4) 1.3727(19)

C(3) C(25) 1.458(2)

C(4) C(27) 1.454(2)

C(4) C(5) 1.4643(18)

C(5) C(6) 1.4095(19)

C(6) C(7) 1.4003(18)

C(6) C(29) 1.4967(18)

C(7) N(11) 1.3779(17)

C(7) C(8) 1.430(2)

C(8) C(9) 1.365(2)

C(9) C(10) 1.4375(19)

C(10) N(11) 1.3739(17)

C(10) C(12) 1.4027(18)

C(12) C(13) 1.4098(19)

C(12) C(35) 1.4947(19)

C(13) N(17) 1.3694(17)

C(13) C(14) 1.4590(18)

C(14) C(15) 1.345(2)

C(15) C(16) 1.4614(19)

C(16) N(17) 1.3738(17)

C(16) C(18) 1.4022(19)

C(18) C(19) 1.4012(18)

C(18) C(41) 1.4974(18)

C(19) N(23) 1.3766(17)

C(19) C(20) 1.4295(19)

C(20) C(21) 1.3649(19)

C(21) C(22) 1.4314(18)

C(22) N(23) 1.3735(17)

C(22) C(24) 1.4015(18)

C(24) C(47) 1.4981(19)

C(25) C(26) 1.125(2)

C(27) C(28) 1.136(2)

C(29) C(34) 1.393(2)

C(29) C(30) 1.394(2)

C(30) C(31) 1.389(2)

C(31) C(32) 1.375(2)

C(32) C(33) 1.385(2)

C(33) C(34) 1.392(2)

C(35) C(40) 1.396(2)

C(35) C(36) 1.402(2)

C(36) C(37) 1.388(2)

C(37) C(38) 1.384(2)

C(38) C(39) 1.379(2)

C(39) C(40) 1.387(2)

C(41) C(42) 1.390(2)

C(41) C(46) 1.392(2)

C(42) C(43) 1.393(2)

C(43) C(44) 1.384(3)

C(44) C(45) 1.370(3)

C(45) C(46) 1.393(2)

C(47) C(48) 1.388(2)

C(47) C(52) 1.390(2)

C(48) C(49) 1.390(2)

C(49) C(50) 1.382(2)

C(50) C(51) 1.379(2)

C(51) C(52) 1.388(2)

**Table 10S**. Bond Angles for **2b**.

A B C Angle

C(2) N(1) C(5) 106.62(11)

N(1) C(2) C(24) 124.94(12)

N(1) C(2) C(3) 110.41(11)

C(24) C(2) C(3) 124.57(12)

C(4) C(3) C(25) 123.80(12)

C(4) C(3) C(2) 106.31(12)

C(25) C(3) C(2) 129.82(12)

C(3) C(4) C(27) 123.21(12)

C(3) C(4) C(5) 106.13(11)

C(27) C(4) C(5) 130.61(13)

N(1) C(5) C(6) 125.39(12)

N(1) C(5) C(4) 110.40(12)

C(6) C(5) C(4) 124.17(12)

C(7) C(6) C(5) 125.82(12)

C(7) C(6) C(29) 115.18(12)

C(5) C(6) C(29) 118.97(12)

N(11) C(7) C(6) 127.65(13)

N(11) C(7) C(8) 106.77(12)

C(6) C(7) C(8) 125.56(12)

C(9) C(8) C(7) 108.40(13)

C(8) C(9) C(10) 107.81(13)

N(11) C(10) C(12) 126.30(12)

N(11) C(10) C(9) 106.90(11)

C(12) C(10) C(9) 126.75(13)

C(10) N(11) C(7) 110.11(12)

C(10) C(12) C(13) 124.83(12)

C(10) C(12) C(35) 116.55(12)

C(13) C(12) C(35) 118.57(11)

N(17) C(13) C(12) 125.47(12)

N(17) C(13) C(14) 110.84(12)

C(12) C(13) C(14) 123.68(12)

C(15) C(14) C(13) 106.58(12)

C(14) C(15) C(16) 106.68(12)

N(17) C(16) C(18) 125.89(12)

N(17) C(16) C(15) 110.51(12)

C(18) C(16) C(15) 123.60(12)

C(13) N(17) C(16) 105.33(11)

C(19) C(18) C(16) 125.02(12)

C(19) C(18) C(41) 116.45(12)

C(16) C(18) C(41) 118.51(12)

N(23) C(19) C(18) 126.06(12)

N(23) C(19) C(20) 107.03(12)

C(18) C(19) C(20) 126.81(12)

C(21) C(20) C(19) 107.91(12)

C(20) C(21) C(22) 108.21(12)

N(23) C(22) C(24) 127.70(12)

N(23) C(22) C(21) 106.86(11)

C(24) C(22) C(21) 125.44(12)

C(22) N(23) C(19) 109.94(12)

C(22) C(24) C(2) 124.99(12)

C(22) C(24) C(47) 114.75(11)

C(2) C(24) C(47) 120.26(11)

C(26) C(25) C(3) 174.77(17)

C(28) C(27) C(4) 173.87(16)

C(34) C(29) C(30) 119.20(13)

C(34) C(29) C(6) 120.77(13)

C(30) C(29) C(6) 120.02(13)

C(31) C(30) C(29) 119.99(15)

C(32) C(31) C(30) 120.52(16)

C(31) C(32) C(33) 120.10(14)

C(32) C(33) C(34) 119.90(15)

C(33) C(34) C(29) 120.27(15)

C(40) C(35) C(36) 118.29(13)

C(40) C(35) C(12) 121.00(12)

C(36) C(35) C(12) 120.69(12)

C(37) C(36) C(35) 120.73(14)

C(38) C(37) C(36) 120.20(15)

C(39) C(38) C(37) 119.51(15)

C(38) C(39) C(40) 120.86(15)

C(39) C(40) C(35) 120.35(14)

C(42) C(41) C(46) 118.94(14)

C(42) C(41) C(18) 120.67(13)

C(46) C(41) C(18) 120.39(13)

C(41) C(42) C(43) 120.34(16)

C(44) C(43) C(42) 120.02(17)

C(45) C(44) C(43) 120.06(15)

C(44) C(45) C(46) 120.37(16)

C(41) C(46) C(45) 120.27(16)

C(48) C(47) C(52) 118.77(13)

C(48) C(47) C(24) 121.70(12)

C(52) C(47) C(24) 119.50(12)

C(47) C(48) C(49) 120.58(14)

C(50) C(49) C(48) 120.16(15)

C(51) C(50) C(49) 119.65(14)

C(50) C(51) C(52) 120.36(15)

C(51) C(52) C(47) 120.47(14)

**Figure 3S.**

**Table 11S. Summary of Crystal Data for 3a.**

| Formula | C48H26N4Ni |
| --- | --- |
| Formula Weight | 717.44 |
| Color of Crystal | black |
| Crystal System | Orthorhombic |
| Space Group | Pna2(1) |
| *a*, Å | 7.3141(9) |
| *b*, Å | 21.308(3) |
| *c*, Å | 20.088(2) |
| , deg. | 90 |
| , deg. | 90 |
| , deg. | 90 |
| *V*, Å3 | 3130.6(7) |
| ** | 4 |
| **calcd, g/cm3 | 1.522 |
| T, K | 128(2) |
| **Å | .71073 |
| R(Fo)a | 0.0321 |
| Rw(Fo)b | 0.0840 |

**Table 12S**. Fractional Coordinates for **3a**.

Atom x y z Uiso

Ni(1) 3196(1) 3520(1) 5062(1) 16(1)

N(2) 3558(3) 4102(1) 4344(1) 18(1)

C(3) 3239(3) 3991(1) 3680(1) 21(1)

C(4) 3592(4) 4546(1) 3299(1) 25(1)

C(5) 4098(4) 5002(1) 3733(1) 24(1)

C(6) 4041(3) 4727(1) 4386(1) 20(1)

C(7) 4271(3) 5061(1) 4980(1) 20(1)

C(8) 3950(3) 4801(1) 5604(1) 19(1)

C(9) 4125(3) 5139(1) 6218(1) 21(1)

C(10) 3441(3) 4770(1) 6701(1) 21(1)

C(11) 2865(3) 4197(1) 6392(1) 18(1)

N(12) 3277(3) 4201(1) 5724(1) 17(1)

C(13) 2102(3) 3666(1) 6716(1) 18(1)

C(14) 2233(3) 3098(1) 6391(1) 19(1)

C(15) 1931(3) 2538(1) 6754(1) 20(1)

C(16) 2421(3) 2050(1) 6353(1) 19(1)

C(17) 2922(3) 2310(1) 5729(1) 20(1)

N(18) 2813(3) 2954(1) 5755(1) 18(1)

C(19) 3198(3) 1910(1) 5203(1) 17(1)

C(20) 3056(3) 2173(1) 4557(1) 19(1)

C(21) 2587(3) 1830(1) 3964(1) 22(1)

C(22) 2330(3) 2254(1) 3483(1) 22(1)

C(23) 2672(3) 2865(1) 3764(1) 21(1)

N(24) 3066(3) 2806(1) 4438(1) 19(1)

C(25) 2706(3) 3416(1) 3407(1) 21(1)

C(26) 4561(3) 5756(1) 4942(1) 20(1)

C(27) 6035(3) 6029(1) 4609(1) 23(1)

C(28) 6187(4) 6677(1) 4567(1) 27(1)

C(29) 4888(3) 7062(1) 4859(1) 26(1)

C(30) 3439(3) 6800(1) 5203(1) 23(1)

C(31) 3263(3) 6149(1) 5233(1) 21(1)

C(32) 1299(3) 3648(1) 7394(1) 20(1)

C(33) 739(3) 4200(1) 7714(1) 23(1)

C(34) -33(3) 4199(1) 8341(1) 26(1)

C(35) -331(4) 3635(1) 8674(1) 28(1)

C(36) 127(3) 3080(1) 8364(1) 24(1)

C(37) 936(3) 3065(1) 7731(1) 20(1)

C(38) 1321(3) 2471(1) 7398(1) 20(1)

C(39) 1172(3) 1834(1) 7608(1) 22(1)

C(40) 1657(3) 1333(1) 7193(1) 21(1)

C(41) 2322(3) 1427(1) 6532(1) 19(1)

C(42) 2964(3) 997(1) 6024(1) 20(1)

C(43) 3255(3) 352(1) 6154(1) 23(1)

C(44) 3948(4) -47(1) 5679(1) 26(1)

C(45) 4415(3) 185(1) 5054(2) 25(1)

C(46) 4162(3) 815(1) 4911(1) 22(1)

C(47) 3397(3) 1233(1) 5372(1) 19(1)

C(48) 2188(4) 3396(1) 2684(1) 23(1)

C(49) 551(4) 3656(1) 2480(1) 30(1)

C(50) 16(4) 3625(1) 1812(2) 35(1)

C(51) 1131(4) 3341(1) 1350(1) 32(1)

C(52) 2772(4) 3088(2) 1545(1) 35(1)

C(53) 3295(4) 3110(2) 2211(1) 33(1)

H(54) 339(4) 455(2) 285(2) 36(9)

H(55) 449(4) 540(1) 364(2) 28(8)

H(56) 454(4) 556(1) 628(1) 22(7)

H(57) 352(4) 485(2) 715(2) 41(9)

H(58) 241(4) 137(1) 392(2) 28(8)

H(59) 192(4) 220(1) 304(2) 32(8)

H(60) 689(3) 579(1) 442(1) 14(6)

H(61) 717(4) 685(1) 434(2) 24(7)

H(62) 504(4) 751(1) 482(1) 20(6)

H(63) 250(4) 706(1) 539(1) 18(6)

H(64) 217(3) 596(1) 543(1) 7(5)

H(65) 79(4) 457(1) 752(1) 21(7)

H(66) -45(4) 457(1) 852(1) 22(7)

H(67) -93(4) 366(1) 914(2) 24(7)

H(68) -11(4) 270(1) 853(1) 26(7)

H(69) 80(4) 174(1) 802(2) 22(7)

H(70) 149(3) 92(1) 733(1) 13(6)

H(71) 298(4) 23(1) 655(2) 22(7)

H(72) 412(4) -45(1) 577(1) 29(8)

H(73) 500(3) -9(1) 474(1) 17(6)

H(74) 466(4) 96(1) 449(1) 22(7)

H(75) 431(5) 292(2) 232(2) 38(9)

H(76) 361(5) 293(2) 123(2) 48(10)

H(77) 88(4) 330(1) 89(2) 28(7)

H(78) -101(5) 384(2) 165(2) 46(9)

H(79) -27(4) 383(1) 278(1) 20(6)

**Table 13S**. Anisotropic Thermal Parameters for **3a**.

Atom U11 U22 U33 U23 U13 U12

Ni(1) 17(1) 18(1) 12(1) 0(1) 0(1) 2(1)

N(2) 20(1) 20(1) 14(1) 1(1) 1(1) 2(1)

C(3) 21(1) 24(1) 18(1) 1(1) -2(1) 4(1)

C(4) 30(1) 29(1) 16(1) 2(1) -1(1) 3(1)

C(5) 32(1) 22(1) 19(1) 5(1) 0(1) 1(1)

C(6) 20(1) 22(1) 18(1) 2(1) 2(1) 4(1)

C(7) 18(1) 19(1) 22(1) 2(1) 1(1) 3(1)

C(8) 18(1) 19(1) 19(1) 1(1) -1(1) 2(1)

C(9) 20(1) 22(1) 21(1) -2(1) -4(1) 3(1)

C(10) 24(1) 21(1) 16(1) -3(1) -3(1) 4(1)

C(11) 16(1) 22(1) 17(1) 0(1) 0(1) 4(1)

N(12) 19(1) 17(1) 15(1) 1(1) 0(1) 1(1)

C(13) 16(1) 24(1) 14(1) -1(1) -2(1) 3(1)

C(14) 17(1) 24(1) 16(1) 3(1) 1(1) 2(1)

C(15) 17(1) 21(1) 21(1) 3(1) -1(1) 1(1)

C(16) 19(1) 22(1) 15(1) 2(1) 0(1) 1(1)

C(17) 18(1) 22(1) 19(1) 4(1) 0(1) -1(1)

N(18) 18(1) 19(1) 15(1) 1(1) 2(1) -1(1)

C(19) 17(1) 17(1) 17(1) 2(1) -1(1) -1(1)

C(20) 15(1) 23(1) 19(1) -4(1) 2(1) 0(1)

C(21) 20(1) 26(1) 21(1) -3(1) -1(1) 1(1)

C(22) 21(1) 26(1) 18(1) -4(1) -3(1) -1(1)

C(23) 18(1) 28(1) 17(1) -2(1) 0(1) 1(1)

N(24) 20(1) 24(1) 12(1) 0(1) 0(1) 2(1)

C(25) 20(1) 29(1) 14(1) -1(1) -2(1) 2(1)

C(26) 21(1) 23(1) 17(1) 0(1) -4(1) 2(1)

C(27) 24(1) 25(1) 22(1) 1(1) 1(1) 2(1)

C(28) 28(1) 29(1) 24(1) 4(1) 0(1) -4(1)

C(29) 33(1) 22(1) 25(1) 2(1) -8(1) 0(1)

C(30) 28(1) 23(1) 18(1) -3(1) -5(1) 5(1)

C(31) 23(1) 22(1) 18(1) 0(1) -2(1) 0(1)

C(32) 14(1) 29(1) 15(1) -1(1) -1(1) 4(1)

C(33) 22(1) 27(1) 19(1) -1(1) -2(1) 3(1)

C(34) 25(1) 33(1) 20(1) -5(1) 0(1) 5(1)

C(35) 25(1) 45(2) 15(1) -2(1) 0(1) 3(1)

C(36) 21(1) 35(1) 15(1) 4(1) 0(1) -2(1)

C(37) 15(1) 29(1) 17(1) 0(1) -2(1) 1(1)

C(38) 15(1) 28(1) 16(1) 0(1) -4(1) 1(1)

C(39) 18(1) 30(1) 17(1) 6(1) -1(1) -2(1)

C(40) 19(1) 24(1) 20(1) 6(1) -3(1) -4(1)

C(41) 15(1) 22(1) 21(1) 2(1) -3(1) -2(1)

C(42) 17(1) 23(1) 21(1) 2(1) -4(1) -2(1)

C(43) 21(1) 24(1) 23(1) 2(1) -4(1) -3(1)

C(44) 24(1) 18(1) 35(1) 1(1) -6(1) -1(1)

C(45) 19(1) 24(1) 31(1) -6(1) -4(1) 0(1)

C(46) 20(1) 23(1) 23(1) -2(1) -1(1) -3(1)

C(47) 16(1) 19(1) 23(1) 1(1) -3(1) -1(1)

C(48) 26(1) 26(1) 16(1) 1(1) -3(1) -4(1)

C(49) 31(1) 38(1) 20(1) 5(1) -1(1) 4(1)

C(50) 35(2) 45(2) 24(1) 6(1) -9(1) 3(1)

C(51) 52(2) 27(1) 17(1) 3(1) -9(1) -6(1)

C(52) 44(2) 43(2) 19(1) -6(1) -1(1) 3(1)

C(53) 31(1) 42(2) 25(1) -4(1) -5(1) 8(1)

**Table 14S**. Bond Lengths for **3a**.

A B Distance

Ni(1) N(18) 1.862(2)

Ni(1) N(2) 1.920(2)

Ni(1) N(12) 1.969(2)

Ni(1) N(24) 1.975(2)

N(2) C(3) 1.376(3)

N(2) C(6) 1.381(3)

C(3) C(25) 1.396(3)

C(3) C(4) 1.432(4)

C(4) C(5) 1.357(4)

C(5) C(6) 1.438(3)

C(6) C(7) 1.399(3)

C(7) C(8) 1.391(3)

C(7) C(26) 1.499(3)

C(8) N(12) 1.390(3)

C(8) C(9) 1.433(3)

C(9) C(10) 1.346(4)

C(10) C(11) 1.432(3)

C(11) N(12) 1.375(3)

C(11) C(13) 1.419(3)

C(13) C(14) 1.378(3)

C(13) C(32) 1.483(3)

C(14) N(18) 1.381(3)

C(14) C(15) 1.418(3)

C(15) C(16) 1.363(3)

C(15) C(38) 1.375(3)

C(16) C(41) 1.377(3)

C(16) C(17) 1.418(3)

C(17) C(19) 1.373(3)

C(17) N(18) 1.376(3)

C(19) C(20) 1.416(3)

C(19) C(47) 1.489(3)

C(20) N(24) 1.369(3)

C(20) C(21) 1.440(4)

C(21) C(22) 1.336(3)

C(22) C(23) 1.440(3)

C(23) C(25) 1.378(3)

C(23) N(24) 1.389(3)

C(25) C(48) 1.501(3)

C(26) C(31) 1.394(3)

C(26) C(27) 1.395(3)

C(27) C(28) 1.386(4)

C(28) C(29) 1.386(4)

C(29) C(30) 1.383(4)

C(30) C(31) 1.393(3)

C(32) C(33) 1.404(3)

C(32) C(37) 1.440(3)

C(33) C(34) 1.379(3)

C(34) C(35) 1.392(4)

C(35) C(36) 1.379(4)

C(36) C(37) 1.403(3)

C(37) C(38) 1.458(3)

C(38) C(39) 1.425(3)

C(39) C(40) 1.400(4)

C(40) C(41) 1.428(3)

C(41) C(42) 1.451(3)

C(42) C(43) 1.414(3)

C(42) C(47) 1.438(3)

C(43) C(44) 1.375(4)

C(44) C(45) 1.392(4)

C(45) C(46) 1.385(3)

C(46) C(47) 1.401(3)

C(48) C(49) 1.382(4)

C(48) C(53) 1.391(4)

C(49) C(50) 1.399(4)

C(50) C(51) 1.376(4)

C(51) C(52) 1.372(4)

C(52) C(53) 1.392(4)

**Table 15S**. Bond Angles for **3a**.

A B C Angle

N(18) Ni(1) N(2) 179.23(10)

N(18) Ni(1) N(12) 88.74(9)

N(2) Ni(1) N(12) 91.58(8)

N(18) Ni(1) N(24) 88.15(9)

N(2) Ni(1) N(24) 91.53(9)

N(12) Ni(1) N(24) 176.84(9)

C(3) N(2) C(6) 105.6(2)

C(3) N(2) Ni(1) 126.49(18)

C(6) N(2) Ni(1) 127.75(16)

N(2) C(3) C(25) 125.4(2)

N(2) C(3) C(4) 110.2(2)

C(25) C(3) C(4) 124.3(2)

C(5) C(4) C(3) 107.3(2)

C(4) C(5) C(6) 106.7(2)

N(2) C(6) C(7) 125.0(2)

N(2) C(6) C(5) 110.2(2)

C(7) C(6) C(5) 124.6(2)

C(8) C(7) C(6) 123.08(19)

C(8) C(7) C(26) 117.6(2)

C(6) C(7) C(26) 118.4(2)

N(12) C(8) C(7) 125.6(2)

N(12) C(8) C(9) 110.1(2)

C(7) C(8) C(9) 124.0(2)

C(10) C(9) C(8) 107.1(2)

C(9) C(10) C(11) 107.1(2)

N(12) C(11) C(13) 122.6(2)

N(12) C(11) C(10) 110.6(2)

C(13) C(11) C(10) 126.6(2)

C(11) N(12) C(8) 104.7(2)

C(11) N(12) Ni(1) 130.33(17)

C(8) N(12) Ni(1) 124.80(16)

C(14) C(13) C(11) 117.1(2)

C(14) C(13) C(32) 116.1(2)

C(11) C(13) C(32) 126.7(2)

C(13) C(14) N(18) 131.0(2)

C(13) C(14) C(15) 119.0(2)

N(18) C(14) C(15) 109.7(2)

C(16) C(15) C(38) 124.3(2)

C(16) C(15) C(14) 107.3(2)

C(38) C(15) C(14) 128.5(2)

C(15) C(16) C(41) 124.5(2)

C(15) C(16) C(17) 107.0(2)

C(41) C(16) C(17) 128.3(2)

C(19) C(17) N(18) 131.0(2)

C(19) C(17) C(16) 118.5(2)

N(18) C(17) C(16) 110.0(2)

C(17) N(18) C(14) 105.9(2)

C(17) N(18) Ni(1) 127.60(17)

C(14) N(18) Ni(1) 126.33(17)

C(17) C(19) C(20) 116.6(2)

C(17) C(19) C(47) 116.1(2)

C(20) C(19) C(47) 126.8(2)

N(24) C(20) C(19) 123.4(2)

N(24) C(20) C(21) 110.8(2)

C(19) C(20) C(21) 125.0(2)

C(22) C(21) C(20) 106.8(2)

C(21) C(22) C(23) 107.7(2)

C(25) C(23) N(24) 125.5(2)

C(25) C(23) C(22) 124.7(2)

N(24) C(23) C(22) 109.7(2)

C(20) N(24) C(23) 105.0(2)

C(20) N(24) Ni(1) 130.36(17)

C(23) N(24) Ni(1) 124.01(17)

C(23) C(25) C(3) 123.2(2)

C(23) C(25) C(48) 118.4(2)

C(3) C(25) C(48) 118.4(2)

C(31) C(26) C(27) 118.4(2)

C(31) C(26) C(7) 118.4(2)

C(27) C(26) C(7) 123.1(2)

C(28) C(27) C(26) 120.4(2)

C(29) C(28) C(27) 120.6(2)

C(30) C(29) C(28) 119.9(2)

C(29) C(30) C(31) 119.6(2)

C(30) C(31) C(26) 121.1(2)

C(33) C(32) C(37) 117.0(2)

C(33) C(32) C(13) 121.0(2)

C(37) C(32) C(13) 121.9(2)

C(34) C(33) C(32) 122.4(2)

C(33) C(34) C(35) 120.3(3)

C(36) C(35) C(34) 119.1(2)

C(35) C(36) C(37) 122.1(2)

C(36) C(37) C(32) 119.0(2)

C(36) C(37) C(38) 121.2(2)

C(32) C(37) C(38) 119.8(2)

C(15) C(38) C(39) 113.6(2)

C(15) C(38) C(37) 113.9(2)

C(39) C(38) C(37) 132.5(2)

C(40) C(39) C(38) 122.1(2)

C(39) C(40) C(41) 122.1(2)

C(16) C(41) C(40) 113.3(2)

C(16) C(41) C(42) 114.1(2)

C(40) C(41) C(42) 132.5(2)

C(43) C(42) C(47) 118.3(2)

C(43) C(42) C(41) 122.2(2)

C(47) C(42) C(41) 119.4(2)

C(44) C(43) C(42) 121.9(2)

C(43) C(44) C(45) 119.7(2)

C(46) C(45) C(44) 119.9(2)

C(45) C(46) C(47) 122.1(2)

C(46) C(47) C(42) 117.9(2)

C(46) C(47) C(19) 120.2(2)

C(42) C(47) C(19) 121.7(2)

C(49) C(48) C(53) 118.5(2)

C(49) C(48) C(25) 119.7(2)

C(53) C(48) C(25) 121.8(2)

C(48) C(49) C(50) 120.6(3)

C(51) C(50) C(49) 120.1(3)

C(52) C(51) C(50) 120.0(2)

C(51) C(52) C(53) 120.1(3)

C(48) C(53) C(52) 120.8(3)

**Figure 4S**

**Table 16S. Summary of Crystal Data for 3b.**

| Formula | C48H28N4 |
| --- | --- |
| Formula Weight | 660.74 |
| Color of Crystal | metallic black |
| Crystal System | Triclinic |
| Space Group | P1bar |
| *a*, Å | 9.8696(9) |
| *b*, Å | 12.4991(11) |
| *c*, Å | 14.6985(13) |
| , deg. | 67.303(2) |
| , deg. | 73.845(2) |
| , deg. | 73.605(2) |
| *V*, Å3 | 1575.1(2) |
| ** | 2 |
| **calcd, g/cm3 | 1.393 |
| T, K | 138(2) |
| **Å | .71073 |
| R(Fo)a | 0.0545 |
| Rw(Fo)b | 0.1143 |

**Table 17S**. Fractional Coordinates for **3b**.

Atom x y z Uiso

N(1) 7536(3) 10134(2) -12(2) 22(1)

C(2) 6783(4) 10933(3) -735(2) 24(1)

C(3) 7138(4) 10588(3) -1624(3) 26(1)

C(4) 8102(4) 9551(3) -1416(3) 26(1)

C(5) 8341(4) 9280(3) -414(2) 22(1)

C(6) 9295(3) 8248(3) 58(2) 21(1)

C(7) 9692(3) 7979(3) 971(2) 20(1)

C(8) 10519(3) 6890(3) 1516(2) 21(1)

C(9) 10612(4) 6975(3) 2389(3) 23(1)

C(10) 9845(3) 8115(3) 2433(2) 21(1)

N(11) 9298(3) 8686(2) 1566(2) 21(1)

C(12) 9527(3) 8612(3) 3209(2) 21(1)

C(13) 8359(4) 9562(3) 3241(3) 24(1)

C(14) 7897(3) 9829(3) 4151(2) 21(1)

C(15) 6668(4) 10693(3) 4048(2) 23(1)

C(16) 6410(4) 10961(3) 3068(2) 22(1)

N(17) 7445(3) 10256(2) 2569(2) 23(1)

C(18) 5273(4) 11899(3) 2761(2) 23(1)

C(19) 5097(3) 12359(3) 1747(3) 23(1)

C(20) 4411(3) 13486(3) 1166(3) 23(1)

C(21) 4599(4) 13509(3) 205(3) 24(1)

C(22) 5439(3) 12381(3) 151(2) 20(1)

N(23) 5735(3) 11728(2) 1099(2) 22(1)

C(24) 5839(3) 11999(3) -676(2) 22(1)

C(25) 9903(3) 7350(3) -468(2) 20(1)

C(26) 8962(4) 6834(3) -652(3) 25(1)

C(27) 9484(4) 6038(3) -1163(3) 28(1)

C(28) 10937(4) 5737(3) -1512(3) 29(1)

C(29) 11885(4) 6247(3) -1344(3) 28(1)

C(30) 11376(4) 7048(3) -820(3) 28(1)

C(31) 10308(4) 8122(3) 4058(2) 23(1)

C(32) 11667(4) 7354(3) 4002(3) 25(1)

C(33) 12410(4) 6856(3) 4776(3) 26(1)

C(34) 11823(4) 7112(3) 5672(3) 29(1)

C(35) 10544(4) 7896(3) 5750(3) 26(1)

C(36) 9771(4) 8433(3) 4956(2) 24(1)

C(37) 8457(4) 9324(3) 5015(2) 23(1)

C(38) 7664(4) 9766(3) 5801(3) 26(1)

C(39) 6439(4) 10654(3) 5694(3) 27(1)

C(40) 5888(4) 11167(3) 4785(3) 25(1)

C(41) 4639(4) 12082(3) 4512(3) 24(1)

C(42) 3733(4) 12629(3) 5192(3) 27(1)

C(43) 2484(4) 13443(3) 4973(3) 28(1)

C(44) 2091(4) 13685(3) 4059(3) 28(1)

C(45) 2977(4) 13165(3) 3376(3) 25(1)

C(46) 4317(4) 12405(3) 3539(3) 24(1)

C(47) 5136(3) 12773(3) -1557(2) 23(1)

C(48) 5500(4) 13853(3) -2179(3) 24(1)

C(49) 4837(4) 14562(3) -3002(3) 26(1)

C(50) 3770(4) 14184(3) -3177(3) 26(1)

C(51) 3363(4) 13117(3) -2542(3) 27(1)

C(52) 4051(4) 12406(3) -1746(3) 23(1)

H(53) 676(3) 1105(3) -229(2) 25(9)

H(54) 868(3) 908(3) -194(2) 40(10)

H(55) 1094(3) 623(3) 129(2) 19(8)

H(56) 1097(4) 634(3) 297(3) 48(11)

H(57) 389(3) 1412(3) 144(2) 20(8)

H(58) 434(3) 1420(3) -45(2) 33(9)

H(59) 793(3) 700(3) -36(2) 27(9)

H(60) 878(4) 563(3) -126(2) 33(9)

H(61) 1130(3) 524(3) -188(2) 34(10)

H(62) 1292(4) 606(3) -159(2) 30(10)

H(63) 1211(4) 737(3) -71(2) 36(10)

H(64) 1211(4) 724(3) 337(3) 40(11)

H(65) 1342(4) 627(3) 473(2) 49(11)

H(66) 1233(3) 675(3) 626(2) 36(10)

H(67) 1011(3) 813(3) 638(2) 20(8)

H(68) 797(3) 944(3) 643(2) 26(9)

H(69) 589(3) 1085(3) 630(2) 17(8)

H(70) 400(3) 1242(3) 587(2) 33(10)

H(71) 177(3) 1384(3) 546(2) 21(8)

H(72) 116(3) 1418(3) 392(2) 25(9)

H(73) 268(3) 1329(2) 281(2) 11(8)

H(74) 626(3) 1410(3) -210(2) 18(9)

H(75) 514(3) 1526(3) -339(2) 28(10)

H(76) 326(4) 1472(4) -378(3) 68(13)

H(77) 262(4) 1287(3) -268(2) 35(10)

H(78) 372(3) 1161(3) -123(2) 29(9)

H(79) 642(5) 1084(4) 131(4) 107(17)

H(80) 866(4) 948(4) 145(3) 61(13)

**Table 18S**. Anisotropic Thermal Parameters for **3b**.

Atom U11 U22 U33 U23 U13 U12

N(1) 27(2) 17(1) 22(2) -7(1) -8(1) -1(1)

C(2) 29(2) 20(2) 25(2) -9(2) -6(2) -6(2)

C(3) 37(2) 20(2) 20(2) -4(2) -9(2) -4(2)

C(4) 36(2) 22(2) 23(2) -9(2) -6(2) -6(2)

C(5) 28(2) 16(2) 23(2) -7(2) -7(2) -4(2)

C(6) 26(2) 15(2) 23(2) -7(2) -6(2) -4(2)

C(7) 21(2) 18(2) 22(2) -9(2) -2(2) -4(1)

C(8) 23(2) 17(2) 28(2) -10(2) -8(2) -2(2)

C(9) 27(2) 19(2) 25(2) -6(2) -9(2) -3(2)

C(10) 23(2) 17(2) 25(2) -5(2) -7(2) -6(1)

N(11) 26(2) 16(1) 24(2) -8(1) -8(1) -2(1)

C(12) 24(2) 17(2) 24(2) -5(2) -7(2) -7(2)

C(13) 29(2) 19(2) 25(2) -5(2) -7(2) -8(2)

C(14) 25(2) 20(2) 20(2) -6(2) -3(2) -7(2)

C(15) 27(2) 20(2) 25(2) -11(2) -5(2) -3(2)

C(16) 28(2) 19(2) 20(2) -7(2) -5(2) -7(2)

N(17) 26(2) 22(2) 25(2) -10(1) -9(1) -3(1)

C(18) 28(2) 21(2) 24(2) -7(2) -8(2) -10(2)

C(19) 22(2) 22(2) 27(2) -12(2) -6(2) -3(2)

C(20) 20(2) 23(2) 27(2) -10(2) -6(2) -2(2)

C(21) 30(2) 19(2) 23(2) -5(2) -10(2) -4(2)

C(22) 22(2) 17(2) 22(2) -7(2) -4(2) -5(1)

N(23) 28(2) 19(2) 19(2) -8(1) -7(1) -3(1)

C(24) 25(2) 19(2) 26(2) -8(2) -8(2) -5(2)

C(25) 25(2) 19(2) 16(2) -5(2) -7(2) -2(2)

C(26) 26(2) 24(2) 26(2) -9(2) -7(2) -1(2)

C(27) 36(2) 22(2) 31(2) -11(2) -16(2) -2(2)

C(28) 45(3) 19(2) 23(2) -9(2) -12(2) -1(2)

C(29) 28(2) 23(2) 31(2) -10(2) -4(2) -1(2)

C(30) 28(2) 27(2) 32(2) -13(2) -8(2) -6(2)

C(31) 30(2) 19(2) 21(2) -4(2) -6(2) -11(2)

C(32) 29(2) 20(2) 28(2) -8(2) -11(2) -3(2)

C(33) 31(2) 21(2) 25(2) -6(2) -9(2) -5(2)

C(34) 36(2) 24(2) 27(2) -3(2) -14(2) -8(2)

C(35) 34(2) 22(2) 24(2) -8(2) -7(2) -8(2)

C(36) 34(2) 16(2) 22(2) -2(2) -10(2) -8(2)

C(37) 30(2) 20(2) 21(2) -6(2) -6(2) -7(2)

C(38) 34(2) 24(2) 25(2) -8(2) -10(2) -9(2)

C(39) 37(2) 25(2) 23(2) -9(2) -5(2) -11(2)

C(40) 30(2) 22(2) 28(2) -12(2) -7(2) -8(2)

C(41) 27(2) 22(2) 25(2) -7(2) -1(2) -11(2)

C(42) 33(2) 24(2) 27(2) -12(2) -3(2) -9(2)

C(43) 34(2) 25(2) 27(2) -15(2) 1(2) -7(2)

C(44) 26(2) 23(2) 34(2) -10(2) -4(2) -5(2)

C(45) 26(2) 26(2) 26(2) -11(2) -3(2) -9(2)

C(46) 25(2) 20(2) 30(2) -12(2) -3(2) -6(2)

C(47) 24(2) 19(2) 24(2) -8(2) -6(2) 1(2)

C(48) 25(2) 21(2) 27(2) -10(2) -5(2) -3(2)

C(49) 36(2) 14(2) 25(2) -5(2) -6(2) -1(2)

C(50) 28(2) 26(2) 22(2) -9(2) -9(2) 4(2)

C(51) 28(2) 31(2) 25(2) -14(2) -6(2) -5(2)

C(52) 23(2) 24(2) 22(2) -7(2) -4(2) -1(2)

**Table 19S**. Bond Lengths for **3b**.

A B Distance

N(1) C(5) 1.365(4)

N(1) C(2) 1.371(4)

C(2) C(24) 1.412(4)

C(2) C(3) 1.452(4)

C(3) C(4) 1.357(5)

C(4) C(5) 1.451(5)

C(5) C(6) 1.421(4)

C(6) C(7) 1.391(4)

C(6) C(25) 1.500(4)

C(7) N(11) 1.383(4)

C(7) C(8) 1.434(4)

C(8) C(9) 1.357(5)

C(9) C(10) 1.430(4)

C(10) N(11) 1.374(4)

C(10) C(12) 1.422(4)

C(12) C(13) 1.408(4)

C(12) C(31) 1.485(5)

C(13) N(17) 1.391(4)

C(13) C(14) 1.423(4)

C(14) C(37) 1.375(5)

C(14) C(15) 1.378(4)

C(15) C(40) 1.375(4)

C(15) C(16) 1.427(4)

C(16) N(17) 1.389(4)

C(16) C(18) 1.402(4)

C(18) C(19) 1.418(5)

C(18) C(46) 1.489(4)

C(19) N(23) 1.375(4)

C(19) C(20) 1.424(4)

C(20) C(21) 1.363(5)

C(21) C(22) 1.439(4)

C(22) N(23) 1.381(4)

C(22) C(24) 1.393(4)

C(24) C(47) 1.499(4)

C(25) C(30) 1.395(5)

C(25) C(26) 1.402(5)

C(26) C(27) 1.375(5)

C(27) C(28) 1.378(5)

C(28) C(29) 1.390(5)

C(29) C(30) 1.394(5)

C(31) C(32) 1.414(4)

C(31) C(36) 1.437(4)

C(32) C(33) 1.371(5)

C(33) C(34) 1.403(5)

C(34) C(35) 1.369(5)

C(35) C(36) 1.414(5)

C(36) C(37) 1.458(4)

C(37) C(38) 1.413(4)

C(38) C(39) 1.390(5)

C(39) C(40) 1.428(5)

C(40) C(41) 1.454(5)

C(41) C(42) 1.397(5)

C(41) C(46) 1.429(5)

C(42) C(43) 1.385(5)

C(43) C(44) 1.400(5)

C(44) C(45) 1.374(5)

C(45) C(46) 1.414(5)

C(47) C(48) 1.388(5)

C(47) C(52) 1.406(5)

C(48) C(49) 1.400(5)

C(49) C(50) 1.388(5)

C(50) C(51) 1.395(5)

C(51) C(52) 1.385(5)

**Table 20S**. Bond Angles for **3b**.

A B C Angle

C(5) N(1) C(2) 105.0(3)

N(1) C(2) C(24) 125.9(3)

N(1) C(2) C(3) 111.4(3)

C(24) C(2) C(3) 122.7(3)

C(4) C(3) C(2) 105.8(3)

C(3) C(4) C(5) 106.8(3)

N(1) C(5) C(6) 126.3(3)

N(1) C(5) C(4) 111.0(3)

C(6) C(5) C(4) 122.7(3)

C(7) C(6) C(5) 126.3(3)

C(7) C(6) C(25) 117.0(3)

C(5) C(6) C(25) 116.7(3)

N(11) C(7) C(6) 126.8(3)

N(11) C(7) C(8) 105.8(3)

C(6) C(7) C(8) 127.3(3)

C(9) C(8) C(7) 108.5(3)

C(8) C(9) C(10) 108.6(3)

N(11) C(10) C(12) 122.5(3)

N(11) C(10) C(9) 106.3(3)

C(12) C(10) C(9) 131.0(3)

C(10) N(11) C(7) 110.8(3)

C(13) C(12) C(10) 120.3(3)

C(13) C(12) C(31) 116.3(3)

C(10) C(12) C(31) 123.2(3)

N(17) C(13) C(12) 131.8(3)

N(17) C(13) C(14) 110.9(3)

C(12) C(13) C(14) 116.9(3)

C(37) C(14) C(15) 123.5(3)

C(37) C(14) C(13) 129.7(3)

C(15) C(14) C(13) 106.7(3)

C(40) C(15) C(14) 123.9(3)

C(40) C(15) C(16) 129.2(3)

C(14) C(15) C(16) 106.9(3)

N(17) C(16) C(18) 132.2(3)

N(17) C(16) C(15) 110.6(3)

C(18) C(16) C(15) 117.0(3)

C(16) N(17) C(13) 104.8(3)

C(16) C(18) C(19) 120.6(3)

C(16) C(18) C(46) 116.8(3)

C(19) C(18) C(46) 122.5(3)

N(23) C(19) C(18) 121.7(3)

N(23) C(19) C(20) 106.4(3)

C(18) C(19) C(20) 131.7(3)

C(21) C(20) C(19) 109.1(3)

C(20) C(21) C(22) 107.6(3)

N(23) C(22) C(24) 126.3(3)

N(23) C(22) C(21) 106.3(3)

C(24) C(22) C(21) 127.3(3)

C(19) N(23) C(22) 110.5(3)

C(22) C(24) C(2) 125.9(3)

C(22) C(24) C(47) 116.1(3)

C(2) C(24) C(47) 118.0(3)

C(30) C(25) C(26) 118.8(3)

C(30) C(25) C(6) 122.0(3)

C(26) C(25) C(6) 119.2(3)

C(27) C(26) C(25) 120.5(3)

C(26) C(27) C(28) 121.0(4)

C(27) C(28) C(29) 119.3(3)

C(28) C(29) C(30) 120.6(4)

C(29) C(30) C(25) 119.9(3)

C(32) C(31) C(36) 116.2(3)

C(32) C(31) C(12) 121.1(3)

C(36) C(31) C(12) 122.7(3)

C(33) C(32) C(31) 123.1(3)

C(32) C(33) C(34) 119.6(3)

C(35) C(34) C(33) 119.8(3)

C(34) C(35) C(36) 121.4(3)

C(35) C(36) C(31) 119.6(3)

C(35) C(36) C(37) 121.4(3)

C(31) C(36) C(37) 119.0(3)

C(14) C(37) C(38) 114.4(3)

C(14) C(37) C(36) 114.3(3)

C(38) C(37) C(36) 131.3(3)

C(39) C(38) C(37) 122.3(3)

C(38) C(39) C(40) 122.0(3)

C(15) C(40) C(39) 113.9(3)

C(15) C(40) C(41) 114.8(3)

C(39) C(40) C(41) 131.3(3)

C(42) C(41) C(46) 119.7(3)

C(42) C(41) C(40) 121.1(3)

C(46) C(41) C(40) 119.3(3)

C(43) C(42) C(41) 122.0(3)

C(42) C(43) C(44) 118.8(3)

C(45) C(44) C(43) 119.9(3)

C(44) C(45) C(46) 122.8(3)

C(45) C(46) C(41) 116.3(3)

C(45) C(46) C(18) 121.1(3)

C(41) C(46) C(18) 122.4(3)

C(48) C(47) C(52) 118.9(3)

C(48) C(47) C(24) 122.1(3)

C(52) C(47) C(24) 118.9(3)

C(47) C(48) C(49) 121.4(4)

C(50) C(49) C(48) 118.9(3)

C(49) C(50) C(51) 120.5(3)

C(52) C(51) C(50) 120.3(4)

C(51) C(52) C(47) 120.1(3)

**Figure 5S.**

**Table 21S. Summary of Crystal Data for 4a.**

| Formula | C56.50H47.20Cl1.40N4NiSi2 |
| --- | --- |
| Formula Weight | 946.70 |
| Color of Crystal | Black/red |
| Crystal System | monoclinic |
| Space Group | P2(1)/c |
| *a*, Å | 21.0116(9) |
| *b*, Å | 17.2824(7) |
| *c*, Å | 12.9553(5) |
| , deg. | 90 |
| , deg. | 94.8410(10) |
| , deg. | 90 |
| *V*, Å3 | 4687.7(3) |
| ** | 4 |
| **calcd, g/cm3 | 1.341 |
| T, K | 134(2) |
| **Å | .71073 |
| R(Fo)a | 0.0386 |
| Rw(Fo)b | 0.1106 |

**Comments:** A number of peaks located at .93, y = 0.93, z = 0.75 were modeled as overlapping benzene (70%) and dichloromethane (30%) solvent molecules

**Table 22S**. Fractional Coordinates for **4a**.

Atom x y z Uiso

Ni(1) 5823(1) 8995(1) 5576(1) 13(1)

N(2) 6651(1) 9198(1) 6330(1) 14(1)

C(3) 7129(1) 9677(1) 6024(1) 15(1)

C(4) 7589(1) 9845(1) 6888(1) 16(1)

C(5) 7411(1) 9406(1) 7708(1) 16(1)

C(6) 6846(1) 8986(1) 7336(1) 14(1)

C(7) 6550(1) 8422(1) 7899(1) 16(1)

C(8) 5935(1) 8173(1) 7607(1) 16(1)

C(9) 5581(1) 7656(1) 8215(1) 18(1)

C(10) 4970(1) 7672(1) 7803(1) 19(1)

C(11) 4950(1) 8165(1) 6905(1) 17(1)

N(12) 5547(1) 8460(1) 6772(1) 15(1)

C(13) 4402(1) 8274(1) 6242(1) 17(1)

C(14) 4424(1) 8633(1) 5289(1) 17(1)

C(15) 3883(1) 8695(1) 4538(1) 19(1)

C(16) 4098(1) 8959(1) 3658(1) 18(1)

C(17) 4776(1) 9078(1) 3857(1) 15(1)

N(18) 4975(1) 8891(1) 4874(1) 15(1)

C(19) 5177(1) 9274(1) 3104(1) 17(1)

C(20) 5825(1) 9411(1) 3344(1) 17(1)

C(21) 6254(1) 9652(1) 2602(1) 22(1)

C(22) 6812(1) 9840(1) 3137(1) 23(1)

C(23) 6732(1) 9709(1) 4213(1) 18(1)

N(24) 6129(1) 9418(1) 4334(1) 16(1)

C(25) 7197(1) 9885(1) 5003(1) 16(1)

C(26) 8102(1) 10383(1) 6957(1) 17(1)

C(27) 8540(1) 10834(1) 7089(1) 21(1)

Si(28) 9182(1) 11559(1) 7285(1) 21(1)

C(29) 8909(1) 12466(1) 6612(2) 34(1)

C(30) 9913(1) 11179(2) 6742(2) 41(1)

C(31) 9331(1) 11724(1) 8701(2) 35(1)

C(32) 7706(1) 9451(1) 8739(1) 19(1)

C(33) 7975(1) 9546(1) 9593(1) 24(1)

Si(34) 8322(1) 9809(1) 10898(1) 28(1)

C(35) 7882(1) 10699(2) 11238(2) 42(1)

C(36) 9185(1) 10026(2) 10861(2) 54(1)

C(37) 8215(2) 9013(2) 11829(2) 42(1)

C(38) 6903(1) 8057(1) 8823(1) 18(1)

C(39) 7452(1) 7627(1) 8686(1) 22(1)

C(40) 7773(1) 7247(1) 9521(2) 28(1)

C(41) 7548(1) 7287(1) 10492(2) 30(1)

C(42) 7006(1) 7716(1) 10641(1) 26(1)

C(43) 6685(1) 8102(1) 9809(1) 21(1)

C(44) 3798(1) 7904(1) 6534(1) 20(1)

C(45) 3527(1) 8119(1) 7431(1) 24(1)

C(46) 3003(1) 7721(1) 7753(2) 31(1)

C(47) 2746(1) 7105(1) 7176(2) 36(1)

C(48) 3006(1) 6893(1) 6274(2) 35(1)

C(49) 3528(1) 7289(1) 5949(2) 26(1)

C(50) 4906(1) 9314(1) 1997(1) 18(1)

C(51) 4418(1) 9831(1) 1686(1) 22(1)

C(52) 4140(1) 9824(1) 671(2) 27(1)

C(53) 4361(1) 9316(1) -44(1) 29(1)

C(54) 4854(1) 8813(1) 244(1) 26(1)

C(55) 5126(1) 8806(1) 1266(1) 21(1)

C(56) 7797(1) 10259(1) 4710(1) 18(1)

C(57) 7794(1) 11017(1) 4333(1) 23(1)

C(58) 8354(1) 11351(1) 4048(2) 31(1)

C(59) 8917(1) 10937(1) 4115(2) 33(1)

C(60) 8925(1) 10183(1) 4482(2) 31(1)

C(61) 8368(1) 9846(1) 4783(1) 24(1)

Cl(62) 9297(1) 8355(1) 6714(1) 76(1)

C(63) 9066(4) 8740(5) 7870(6) 76(3)

Cl(64) 9435(1) 8288(1) 8980(1) 69(1)

C(65) 9312(7) 8966(12) 7870(20) 90(7)

C(66) 9443(4) 8890(8) 6837(7) 56(3)

C(67) 9325(4) 8325(6) 6151(8) 38(2)

C(68) 9178(6) 7654(9) 6668(13) 91(4)

C(69) 9048(6) 7715(8) 7708(11) 81(4)

C(70) 9107(6) 8296(11) 8301(13) 88(6)

H(63A) 860 869 788 91

H(63B) 917 930 790 91

H(65) 936 944 824 108

H(66) 966 932 657 68

H(67) 934 837 542 46

H(68) 917 717 633 109

H(69) 889 726 801 98

H(70) 902 827 901 106

H(71) 576(1) 737(1) 879(2) 24(5)

H(72) 461(1) 739(1) 804(2) 23(5)

H(73) 345(1) 856(1) 466(2) 20(5)

H(74) 387(1) 903(1) 301(2) 23(5)

H(75) 615(1) 966(1) 189(2) 26(5)

H(76) 722(1) 1002(1) 284(2) 41(7)

H(77) 853(2) 1267(2) 691(2) 72(10)

H(78) 879(1) 1235(2) 588(2) 53(8)

H(79) 922(2) 1282(2) 669(2) 68(10)

H(80) 983(2) 1112(2) 597(3) 73(10)

H(81) 1029(2) 1150(2) 696(2) 67(9)

H(82) 1001(1) 1069(2) 702(2) 43(7)

H(83) 963(2) 1216(2) 887(2) 71(10)

H(84) 951(1) 1128(2) 903(2) 58(8)

H(85) 895(1) 1184(2) 901(2) 54(8)

H(86) 798(2) 1112(2) 1071(3) 74(10)

H(87) 799(1) 1087(2) 1197(2) 62(9)

H(88) 738(2) 1060(2) 1117(2) 70(10)

H(89) 925(2) 1041(2) 1034(3) 93(12)

H(90) 939(2) 951(2) 1061(2) 65(10)

H(91) 932(1) 1027(2) 1160(2) 52(8)

H(92) 838(1) 915(2) 1252(2) 47(7)

H(93) 841(1) 853(2) 1160(2) 60(9)

H(94) 778(1) 891(2) 1185(2) 44(7)

H(95) 760(1) 759(1) 803(2) 24(5)

H(96) 815(1) 697(1) 942(2) 35(6)

H(97) 778(1) 703(1) 1105(2) 33(6)

H(98) 687(1) 776(1) 1128(2) 22(5)

H(99) 630(1) 840(1) 988(2) 22(5)

H(100) 370(1) 854(1) 782(2) 30(6)

H(101) 281(1) 788(1) 835(2) 39(7)

H(102) 241(1) 681(2) 738(2) 49(8)

H(103) 286(1) 647(2) 590(2) 54(8)

H(104) 371(1) 712(1) 535(2) 32(6)

H(105) 425(1) 1018(1) 220(2) 28(6)

H(106) 379(1) 1013(1) 48(2) 36(6)

H(107) 417(1) 931(1) -74(2) 38(7)

H(108) 497(1) 848(2) -20(2) 37(7)

H(109) 545(1) 845(1) 147(2) 25(5)

H(110) 742(1) 1129(1) 428(2) 21(5)

H(111) 834(1) 1185(2) 381(2) 37(7)

H(112) 929(1) 1119(1) 393(2) 38(6)

H(113) 931(1) 989(1) 452(2) 34(6)

H(114) 836(1) 932(1) 506(2) 25(5)

**Table 23S**. Anisotropic Thermal Parameters for **4a**.

Atom U11 U22 U33 U23 U13 U12

Ni(1) 14(1) 14(1) 12(1) 0(1) 1(1) -1(1)

N(2) 15(1) 15(1) 13(1) 1(1) 2(1) 1(1)

C(3) 14(1) 13(1) 16(1) 0(1) 1(1) 1(1)

C(4) 15(1) 15(1) 17(1) -2(1) 1(1) 1(1)

C(5) 16(1) 16(1) 16(1) -1(1) 1(1) 1(1)

C(6) 13(1) 15(1) 14(1) -1(1) 2(1) 2(1)

C(7) 17(1) 16(1) 14(1) 0(1) 2(1) 2(1)

C(8) 19(1) 15(1) 14(1) 0(1) 2(1) 1(1)

C(9) 22(1) 14(1) 17(1) 1(1) 1(1) -2(1)

C(10) 21(1) 17(1) 19(1) 2(1) 2(1) -4(1)

C(11) 19(1) 14(1) 17(1) 0(1) 3(1) -2(1)

N(12) 15(1) 14(1) 15(1) 0(1) 2(1) -1(1)

C(13) 16(1) 17(1) 18(1) -1(1) 3(1) -1(1)

C(14) 16(1) 16(1) 18(1) -2(1) 1(1) 1(1)

C(15) 17(1) 21(1) 19(1) -3(1) 0(1) 2(1)

C(16) 16(1) 20(1) 19(1) -3(1) 0(1) 3(1)

C(17) 17(1) 14(1) 15(1) -2(1) 0(1) 2(1)

N(18) 17(1) 15(1) 13(1) -1(1) 2(1) 1(1)

C(19) 20(1) 15(1) 15(1) -1(1) 0(1) 1(1)

C(20) 21(1) 16(1) 14(1) 1(1) 1(1) -1(1)

C(21) 24(1) 28(1) 15(1) 3(1) 2(1) -6(1)

C(22) 24(1) 31(1) 16(1) 4(1) 3(1) -7(1)

C(23) 20(1) 19(1) 15(1) 1(1) 2(1) -2(1)

N(24) 17(1) 16(1) 14(1) 0(1) 1(1) -1(1)

C(25) 17(1) 16(1) 16(1) 0(1) 2(1) -1(1)

C(26) 17(1) 18(1) 16(1) 0(1) 1(1) 3(1)

C(27) 20(1) 21(1) 21(1) -3(1) 2(1) 1(1)

Si(28) 16(1) 23(1) 25(1) -3(1) 2(1) -3(1)

C(29) 40(1) 25(1) 37(1) 4(1) 7(1) -6(1)

C(30) 20(1) 57(2) 48(1) -8(1) 5(1) 4(1)

C(31) 37(1) 36(1) 29(1) -6(1) -4(1) -4(1)

C(32) 18(1) 20(1) 20(1) 1(1) 3(1) 0(1)

C(33) 24(1) 30(1) 19(1) 1(1) 1(1) -3(1)

Si(34) 33(1) 33(1) 17(1) 2(1) -4(1) -9(1)

C(35) 65(2) 35(1) 26(1) -4(1) 2(1) -7(1)

C(36) 37(1) 81(2) 41(1) 14(1) -14(1) -18(1)

C(37) 62(2) 40(1) 23(1) 3(1) -3(1) -14(1)

C(38) 19(1) 16(1) 18(1) 4(1) -1(1) -3(1)

C(39) 24(1) 21(1) 22(1) 3(1) 1(1) 2(1)

C(40) 27(1) 24(1) 33(1) 7(1) -3(1) 6(1)

C(41) 33(1) 26(1) 28(1) 13(1) -7(1) -4(1)

C(42) 31(1) 30(1) 17(1) 8(1) -1(1) -8(1)

C(43) 22(1) 22(1) 19(1) 2(1) 1(1) -4(1)

C(44) 16(1) 19(1) 24(1) 4(1) 1(1) -1(1)

C(45) 21(1) 26(1) 24(1) 4(1) 3(1) -1(1)

C(46) 24(1) 38(1) 32(1) 13(1) 9(1) 4(1)

C(47) 18(1) 32(1) 56(1) 18(1) 4(1) -5(1)

C(48) 24(1) 24(1) 55(1) 2(1) -5(1) -5(1)

C(49) 22(1) 23(1) 35(1) -2(1) 1(1) -1(1)

C(50) 19(1) 19(1) 15(1) 2(1) 0(1) -4(1)

C(51) 25(1) 18(1) 21(1) 1(1) -1(1) -1(1)

C(52) 31(1) 23(1) 26(1) 7(1) -7(1) -4(1)

C(53) 38(1) 30(1) 17(1) 5(1) -7(1) -11(1)

C(54) 33(1) 28(1) 17(1) -3(1) 5(1) -8(1)

C(55) 22(1) 23(1) 19(1) 1(1) 3(1) -3(1)

C(56) 18(1) 23(1) 14(1) -2(1) 2(1) -5(1)

C(57) 22(1) 28(1) 20(1) 5(1) 0(1) -5(1)

C(58) 32(1) 36(1) 25(1) 9(1) 0(1) -15(1)

C(59) 26(1) 47(1) 27(1) -2(1) 9(1) -15(1)

C(60) 20(1) 42(1) 33(1) -12(1) 8(1) -4(1)

C(61) 23(1) 27(1) 24(1) -7(1) 5(1) -1(1)

Cl(62) 58(1) 102(1) 69(1) -3(1) 8(1) 32(1)

C(63) 62(5) 93(7) 72(4) 7(4) 11(4) 48(5)

Cl(64) 59(1) 82(1) 66(1) -5(1) -3(1) 32(1)

C(65) 58(9) 67(9) 149(16) -33(9) 36(10) -4(7)

C(66) 42(5) 92(9) 38(5) -20(5) 17(4) -23(5)

C(67) 26(4) 54(5) 35(4) -8(4) -3(4) 6(3)

C(68) 67(8) 72(9) 135(14) 8(9) 9(8) -4(7)

C(69) 65(7) 90(9) 92(9) 16(8) 27(7) 8(6)

C(70) 43(6) 137(14) 91(11) -84(10) 36(7) -48(8)

**Table 24S**. Bond Lengths for **4a**.

A B Distance

Ni(1) N(24) 1.9265(14)

Ni(1) N(12) 1.9341(13)

Ni(1) N(18) 1.9396(13)

Ni(1) N(2) 1.9540(13)

N(2) C(6) 1.3821(19)

N(2) C(3) 1.384(2)

C(3) C(25) 1.390(2)

C(3) C(4) 1.446(2)

C(4) C(5) 1.382(2)

C(4) C(26) 1.421(2)

C(5) C(32) 1.426(2)

C(5) C(6) 1.440(2)

C(6) C(7) 1.395(2)

C(7) C(8) 1.385(2)

C(7) C(38) 1.493(2)

C(8) N(12) 1.390(2)

C(8) C(9) 1.439(2)

C(9) C(10) 1.348(2)

C(10) C(11) 1.440(2)

C(11) N(12) 1.379(2)

C(11) C(13) 1.389(2)

C(13) C(14) 1.387(2)

C(13) C(44) 1.498(2)

C(14) N(18) 1.391(2)

C(14) C(15) 1.437(2)

C(15) C(16) 1.342(2)

C(16) C(17) 1.441(2)

C(17) N(18) 1.386(2)

C(17) C(19) 1.386(2)

C(19) C(20) 1.391(2)

C(19) C(50) 1.499(2)

C(20) N(24) 1.384(2)

C(20) C(21) 1.433(2)

C(21) C(22) 1.352(2)

C(22) C(23) 1.436(2)

C(23) N(24) 1.384(2)

C(23) C(25) 1.388(2)

C(25) C(56) 1.494(2)

C(26) C(27) 1.207(2)

C(27) Si(28) 1.8437(18)

Si(28) C(31) 1.858(2)

Si(28) C(30) 1.860(2)

Si(28) C(29) 1.861(2)

C(32) C(33) 1.210(2)

C(33) Si(34) 1.8408(18)

Si(34) C(37) 1.855(2)

Si(34) C(36) 1.858(3)

Si(34) C(35) 1.866(3)

C(38) C(43) 1.395(2)

C(38) C(39) 1.396(2)

C(39) C(40) 1.391(2)

C(40) C(41) 1.382(3)

C(41) C(42) 1.387(3)

C(42) C(43) 1.392(2)

C(44) C(45) 1.387(3)

C(44) C(49) 1.397(3)

C(45) C(46) 1.393(3)

C(46) C(47) 1.384(3)

C(47) C(48) 1.380(3)

C(48) C(49) 1.389(3)

C(50) C(51) 1.394(2)

C(50) C(55) 1.397(2)

C(51) C(52) 1.393(2)

C(52) C(53) 1.384(3)

C(53) C(54) 1.379(3)

C(54) C(55) 1.397(2)

C(56) C(61) 1.393(2)

C(56) C(57) 1.397(3)

C(57) C(58) 1.389(3)

C(58) C(59) 1.379(3)

C(59) C(60) 1.387(3)

C(60) C(61) 1.392(3)

Cl(62) C(63) 1.745(8)

C(63) Cl(64) 1.757(7)

C(65) C(70) 1.37(3)

C(65) C(66) 1.40(3)

C(66) C(67) 1.330(14)

C(67) C(68) 1.386(18)

C(68) C(69) 1.402(19)

C(69) C(70) 1.264(17)

**Table 25S**. Bond Angles for **4a**.

A B C Angle

N(24) Ni(1) N(12) 173.68(6)

N(24) Ni(1) N(18) 90.07(6)

N(12) Ni(1) N(18) 90.33(6)

N(24) Ni(1) N(2) 90.20(6)

N(12) Ni(1) N(2) 90.02(5)

N(18) Ni(1) N(2) 174.41(6)

C(6) N(2) C(3) 105.34(12)

C(6) N(2) Ni(1) 127.14(11)

C(3) N(2) Ni(1) 126.96(10)

N(2) C(3) C(25) 124.23(14)

N(2) C(3) C(4) 110.62(13)

C(25) C(3) C(4) 124.70(15)

C(5) C(4) C(26) 124.34(15)

C(5) C(4) C(3) 106.16(14)

C(26) C(4) C(3) 129.37(15)

C(4) C(5) C(32) 124.48(15)

C(4) C(5) C(6) 106.76(14)

C(32) C(5) C(6) 128.41(15)

N(2) C(6) C(7) 124.70(14)

N(2) C(6) C(5) 110.59(14)

C(7) C(6) C(5) 124.67(14)

C(8) C(7) C(6) 121.45(14)

C(8) C(7) C(38) 118.46(14)

C(6) C(7) C(38) 120.07(14)

C(7) C(8) N(12) 125.02(15)

C(7) C(8) C(9) 123.88(15)

N(12) C(8) C(9) 110.61(14)

C(10) C(9) C(8) 106.77(15)

C(9) C(10) C(11) 107.17(15)

N(12) C(11) C(13) 126.03(15)

N(12) C(11) C(10) 110.75(14)

C(13) C(11) C(10) 123.09(15)

C(11) N(12) C(8) 104.50(13)

C(11) N(12) Ni(1) 127.91(11)

C(8) N(12) Ni(1) 126.76(11)

C(14) C(13) C(11) 121.54(15)

C(14) C(13) C(44) 120.56(14)

C(11) C(13) C(44) 117.49(14)

C(13) C(14) N(18) 125.39(14)

C(13) C(14) C(15) 123.56(15)

N(18) C(14) C(15) 110.59(14)

C(16) C(15) C(14) 107.26(15)

C(15) C(16) C(17) 107.14(14)

N(18) C(17) C(19) 125.01(14)

N(18) C(17) C(16) 110.62(14)

C(19) C(17) C(16) 124.06(15)

C(17) N(18) C(14) 104.33(13)

C(17) N(18) Ni(1) 128.04(11)

C(14) N(18) Ni(1) 127.60(11)

C(17) C(19) C(20) 121.78(15)

C(17) C(19) C(50) 118.72(14)

C(20) C(19) C(50) 119.48(14)

N(24) C(20) C(19) 125.11(15)

N(24) C(20) C(21) 110.67(14)

C(19) C(20) C(21) 123.88(15)

C(22) C(21) C(20) 107.00(15)

C(21) C(22) C(23) 107.01(15)

N(24) C(23) C(25) 126.23(15)

N(24) C(23) C(22) 110.54(14)

C(25) C(23) C(22) 123.19(15)

C(23) N(24) C(20) 104.66(13)

C(23) N(24) Ni(1) 127.26(11)

C(20) N(24) Ni(1) 127.66(11)

C(23) C(25) C(3) 121.46(15)

C(23) C(25) C(56) 117.68(14)

C(3) C(25) C(56) 120.73(14)

C(27) C(26) C(4) 175.44(18)

C(26) C(27) Si(28) 177.49(16)

C(27) Si(28) C(31) 107.49(10)

C(27) Si(28) C(30) 109.05(10)

C(31) Si(28) C(30) 110.63(12)

C(27) Si(28) C(29) 108.27(10)

C(31) Si(28) C(29) 110.67(11)

C(30) Si(28) C(29) 110.62(12)

C(33) C(32) C(5) 174.74(19)

C(32) C(33) Si(34) 172.42(18)

C(33) Si(34) C(37) 110.71(10)

C(33) Si(34) C(36) 109.72(11)

C(37) Si(34) C(36) 109.82(14)

C(33) Si(34) C(35) 104.75(10)

C(37) Si(34) C(35) 111.66(13)

C(36) Si(34) C(35) 110.08(15)

C(43) C(38) C(39) 118.95(15)

C(43) C(38) C(7) 122.11(15)

C(39) C(38) C(7) 118.88(15)

C(40) C(39) C(38) 120.32(17)

C(41) C(40) C(39) 120.20(18)

C(40) C(41) C(42) 120.12(17)

C(41) C(42) C(43) 119.89(18)

C(42) C(43) C(38) 120.51(17)

C(45) C(44) C(49) 118.83(17)

C(45) C(44) C(13) 120.87(16)

C(49) C(44) C(13) 120.09(16)

C(44) C(45) C(46) 120.56(19)

C(47) C(46) C(45) 120.1(2)

C(48) C(47) C(46) 119.84(19)

C(47) C(48) C(49) 120.3(2)

C(48) C(49) C(44) 120.4(2)

C(51) C(50) C(55) 118.96(15)

C(51) C(50) C(19) 121.10(15)

C(55) C(50) C(19) 119.89(15)

C(52) C(51) C(50) 120.39(17)

C(53) C(52) C(51) 120.04(18)

C(54) C(53) C(52) 120.30(17)

C(53) C(54) C(55) 119.98(18)

C(54) C(55) C(50) 120.28(17)

C(61) C(56) C(57) 118.79(16)

C(61) C(56) C(25) 120.10(16)

C(57) C(56) C(25) 121.09(15)

C(58) C(57) C(56) 120.30(18)

C(59) C(58) C(57) 120.5(2)

C(58) C(59) C(60) 119.76(18)

C(59) C(60) C(61) 120.11(19)

C(60) C(61) C(56) 120.49(19)

Cl(62) C(63) Cl(64) 113.4(4)

C(70) C(65) C(66) 113.7(16)

C(67) C(66) C(65) 132.1(13)

C(66) C(67) C(68) 109.1(13)

C(67) C(68) C(69) 118.2(14)

C(70) C(69) C(68) 128.8(15)

C(69) C(70) C(65) 116.4(17)

**Figure 6S.**

**Table 26S. Summary of Crystal Data for 4b.**

| Formula | C54H46N4Si2 |
| --- | --- |
| Formula Weight | 807.13 |
| Color of Crystal | Brown/orange |
| Crystal System | Triclinic |
| Space Group | P1bar |
| *a*, Å | 12.5229(13) |
| *b*, Å | 13.1739(14) |
| *c*, Å | 15.3064(16) |
| , deg. | 115.102(3) |
| , deg. | 104.733(3) |
| , deg. | 93.997(3) |
| *V*, Å3 | 2165.6(4) |
| ** | 2 |
| **calcd, g/cm3 | 1.238 |
| T, K | 133(2) |
| **Å | .71073 |
| R(Fo)a | 0.0830 |
| Rw(Fo)b | 0.2496 |

**Table 27S**. Fractional Coordinates for **4b**.

Atom x y z Uiso

N(1) -1381(3) -2219(3) 3914(3) 22(1)

C(2) -2521(4) -2685(4) 3540(4) 20(1)

C(3) -3053(4) -2482(4) 2689(4) 24(1)

C(4) -2214(4) -1860(4) 2563(4) 23(1)

C(5) -1173(4) -1699(4) 3341(4) 21(1)

C(6) -111(4) -1138(4) 3474(4) 19(1)

C(7) 917(4) -1028(4) 4176(4) 22(1)

C(8) 1975(4) -382(4) 4340(4) 25(1)

C(9) 2778(4) -534(4) 5043(4) 28(1)

C(10) 2232(4) -1279(4) 5326(4) 24(1)

N(11) 1103(3) -1536(3) 4801(3) 19(1)

C(12) 2772(4) -1715(4) 5976(4) 24(1)

C(13) 2216(4) -2475(4) 6222(4) 25(1)

C(14) 2768(5) -2832(5) 6970(4) 35(1)

C(15) 1957(5) -3440(5) 7080(4) 32(1)

C(16) 887(4) -3479(4) 6401(4) 25(1)

N(17) 1074(4) -2888(3) 5881(3) 26(1)

C(18) -181(5) -3950(4) 6364(4) 24(1)

C(19) -1211(4) -3961(4) 5749(4) 22(1)

C(20) -2299(5) -4468(5) 5679(4) 32(1)

C(21) -3102(5) -4273(5) 5029(4) 29(1)

C(22) -2534(4) -3638(4) 4646(4) 23(1)

N(23) -1403(4) -3479(3) 5098(3) 23(1)

C(24) -3066(4) -3288(4) 3934(4) 22(1)

C(25) -4208(4) -2952(4) 1967(4) 25(1)

C(26) -5129(5) -3337(5) 1321(5) 34(1)

Si(27) -6539(1) -4019(1) 333(1) 34(1)

C(28) -7013(5) -5477(4) 159(5) 41(2)

C(29) -7585(4) -3128(5) 760(5) 41(2)

C(30) -6428(6) -4117(6) -872(5) 53(2)

C(31) -2430(4) -1523(4) 1764(4) 28(1)

C(32) -2676(5) -1256(5) 1080(4) 33(1)

Si(33) -3055(1) -986(1) -44(1) 34(1)

C(34) -4586(5) -1461(6) -676(6) 58(2)

C(35) -2343(5) -1891(4) -895(4) 34(1)

C(36) -2595(5) 545(5) 320(5) 40(2)

C(37) 11(4) -673(4) 2755(3) 19(1)

C(38) -151(4) 404(4) 2913(4) 27(1)

C(39) -5(5) 825(5) 2244(4) 36(1)

C(40) 331(4) 156(5) 1423(4) 31(1)

C(41) 487(4) -921(5) 1255(4) 28(1)

C(42) 345(4) -1335(5) 1919(4) 26(1)

C(43) 4022(4) -1336(4) 6433(4) 25(1)

C(44) 4736(4) -2095(5) 6192(4) 31(1)

C(45) 5904(5) -1721(6) 6594(4) 42(2)

C(46) 6351(5) -560(6) 7233(5) 47(2)

C(47) 5639(6) 185(6) 7488(5) 53(2)

C(48) 4483(5) -185(5) 7103(5) 44(2)

C(49) -193(4) -4397(4) 7114(4) 22(1)

C(50) 201(4) -5386(4) 7051(4) 27(1)

C(51) 187(5) -5759(4) 7767(4) 32(1)

C(52) -209(4) -5164(4) 8562(4) 26(1)

C(53) -577(4) -4171(5) 8653(4) 28(1)

C(54) -572(5) -3794(4) 7935(4) 30(1)

C(55) -4329(4) -3512(4) 3604(4) 25(1)

C(56) -4883(4) -2608(5) 3829(4) 30(1)

C(57) -6040(5) -2780(6) 3556(4) 43(2)

C(58) -6691(6) -3854(7) 3072(5) 52(2)

C(59) -6176(5) -4776(6) 2842(4) 48(2)

C(60) -4977(5) -4627(5) 3093(4) 38(2)

H(61) 210 7 402 30

H(62) 356 -20 530 33

H(105) 58 -196 486 22

H(63) 355 -267 732 42

H(64) 206 -378 752 39

H(65) -243 -488 604 38

H(66) -389 -451 485 35

H(106) -87 -312 499 27

H(69) -771 -585 -41 61

H(68) -715 -542 78 61

H(67) -643 -592 2 61

H(72) -740 -239 76 61

H(70) -755 -300 145 61

H(71) -835 -353 29 61

H(74) -626 -335 -81 79

H(73) -714 -454 -141 79

H(75) -582 -452 -104 79

H(76) -481 -227 -86 86

H(78) -479 -136 -129 86

H(77) -498 -100 -22 86

H(80) -153 -167 -56 50

H(81) -252 -180 -152 50

H(79) -260 -269 -107 50

H(84) -285 102 89 60

H(83) -292 69 -26 60

H(82) -177 74 52 60

H(85) -37 87 349 33

H(86) -14 157 235 44

H(87) 45 44 98 37

H(88) 70 -139 68 34

H(89) 48 -208 181 31

H(90) 443 -288 575 37

H(91) 639 -225 643 51

H(92) 714 -29 749 57

H(93) 595 97 794 64

H(94) 400 34 729 52

H(95) 48 -581 651 32

H(96) 45 -643 771 38

H(97) -23 -544 904 32

H(98) -83 -375 921 34

H(99) -83 -311 800 36

H(100) -445 -185 418 36

H(101) -639 -214 371 51

H(102) -749 -396 290 62

H(103) -662 -553 251 58

H(104) -463 -527 292 46

**Table 28S**. Anisotropic Thermal Parameters for **4b**.

Atom U11 U22 U33 U23 U13 U12

N(1) 28(2) 20(2) 27(2) 16(2) 16(2) 10(2)

C(2) 20(3) 22(3) 28(3) 16(2) 13(2) 7(2)

C(3) 24(3) 32(3) 34(3) 27(3) 17(2) 13(2)

C(4) 23(3) 28(3) 32(3) 23(3) 14(2) 12(2)

C(5) 25(3) 21(3) 26(3) 14(2) 15(2) 8(2)

C(6) 22(3) 17(3) 22(3) 11(2) 8(2) 6(2)

C(7) 31(3) 17(3) 23(3) 11(2) 13(2) 1(2)

C(8) 27(3) 24(3) 25(3) 17(2) 0(2) -4(2)

C(9) 24(3) 24(3) 31(3) 14(3) 1(2) -6(2)

C(10) 36(3) 19(3) 21(3) 11(2) 10(2) 4(2)

N(11) 18(2) 19(2) 23(2) 12(2) 8(2) 3(2)

C(12) 30(3) 21(3) 24(3) 13(2) 11(2) 7(2)

C(13) 37(3) 23(3) 25(3) 15(2) 16(3) 16(3)

C(14) 24(3) 49(4) 48(4) 33(3) 14(3) 18(3)

C(15) 37(3) 44(4) 41(3) 34(3) 24(3) 16(3)

C(16) 35(3) 24(3) 25(3) 15(2) 16(2) 14(2)

N(17) 35(3) 23(2) 30(2) 16(2) 19(2) 9(2)

C(18) 39(3) 15(3) 25(3) 10(2) 18(3) 9(2)

C(19) 33(3) 20(3) 21(3) 12(2) 13(2) 7(2)

C(20) 41(3) 29(3) 31(3) 20(3) 12(3) -5(3)

C(21) 29(3) 34(3) 26(3) 21(3) 2(2) -6(3)

C(22) 29(3) 19(3) 22(3) 10(2) 12(2) 1(2)

N(23) 34(3) 22(2) 24(2) 16(2) 16(2) 8(2)

C(24) 33(3) 19(3) 22(3) 12(2) 14(2) 6(2)

C(25) 22(3) 29(3) 30(3) 18(3) 9(2) 1(2)

C(26) 26(3) 34(3) 49(4) 22(3) 19(3) 6(3)

Si(27) 35(1) 26(1) 37(1) 12(1) 12(1) -2(1)

C(28) 49(4) 22(3) 58(4) 15(3) 35(3) 4(3)

C(29) 23(3) 27(3) 54(4) 14(3) -8(3) -2(3)

C(30) 56(4) 58(4) 46(4) 37(4) 2(3) -11(3)

C(31) 23(3) 27(3) 34(3) 11(3) 14(3) 4(2)

C(32) 36(3) 34(3) 33(3) 18(3) 10(3) 4(3)

Si(33) 41(1) 29(1) 37(1) 17(1) 16(1) 0(1)

C(34) 35(4) 55(5) 91(6) 43(4) 20(4) 2(3)

C(35) 41(3) 26(3) 33(3) 17(3) 5(3) 2(3)

C(36) 42(4) 30(3) 62(4) 26(3) 28(3) 13(3)

C(37) 14(2) 22(3) 19(2) 11(2) 1(2) 1(2)

C(38) 41(3) 19(3) 21(3) 8(2) 9(2) 4(2)

C(39) 58(4) 19(3) 34(3) 17(3) 10(3) 1(3)

C(40) 30(3) 39(3) 28(3) 23(3) 5(3) -1(3)

C(41) 22(3) 42(4) 31(3) 22(3) 13(2) 10(3)

C(42) 26(3) 30(3) 35(3) 21(3) 17(2) 13(2)

C(43) 29(3) 30(3) 21(3) 18(3) 6(2) 4(2)

C(44) 20(3) 41(3) 26(3) 14(3) 2(2) 5(3)

C(45) 37(4) 65(5) 32(3) 27(3) 11(3) 18(3)

C(46) 19(3) 69(5) 43(4) 30(4) -10(3) -11(3)

C(47) 47(4) 32(4) 60(4) 22(3) -13(4) -9(3)

C(48) 38(4) 28(3) 45(4) 13(3) -10(3) 1(3)

C(49) 22(3) 20(3) 27(3) 14(2) 10(2) 1(2)

C(50) 40(3) 18(3) 24(3) 10(2) 13(3) 6(2)

C(51) 50(4) 21(3) 31(3) 18(3) 13(3) 10(3)

C(52) 26(3) 30(3) 27(3) 20(3) 4(2) 0(2)

C(53) 30(3) 31(3) 21(3) 10(2) 11(2) 3(3)

C(54) 39(3) 23(3) 33(3) 14(3) 19(3) 13(3)

C(55) 28(3) 30(3) 17(3) 13(2) 4(2) -5(2)

C(56) 20(3) 44(4) 22(3) 13(3) 8(2) 0(3)

C(57) 37(4) 67(5) 30(3) 26(3) 12(3) 11(3)

C(58) 39(4) 82(6) 37(4) 35(4) 6(3) 3(4)

C(59) 39(4) 59(5) 26(3) 19(3) -9(3) -31(3)

C(60) 58(4) 36(3) 24(3) 20(3) 8(3) -1(3)

**Table 29S**. Bond Lengths for **4b**.

A B Distance

N(1) C(2) 1.380(6)

N(1) C(5) 1.382(6)

C(2) C(24) 1.414(6)

C(2) C(3) 1.447(6)

C(3) C(4) 1.387(7)

C(3) C(25) 1.476(7)

C(4) C(31) 1.441(7)

C(4) C(5) 1.456(7)

C(5) C(6) 1.397(7)

C(6) C(7) 1.404(7)

C(6) C(37) 1.501(6)

C(7) N(11) 1.367(6)

C(7) C(8) 1.427(7)

C(8) C(9) 1.367(7)

C(9) C(10) 1.428(7)

C(10) N(11) 1.373(6)

C(10) C(12) 1.405(7)

C(12) C(13) 1.409(7)

C(12) C(43) 1.492(7)

C(13) N(17) 1.372(7)

C(13) C(14) 1.452(7)

C(14) C(15) 1.338(7)

C(15) C(16) 1.454(7)

C(16) N(17) 1.376(6)

C(16) C(18) 1.411(7)

C(18) C(19) 1.385(7)

C(18) C(49) 1.499(6)

C(19) N(23) 1.374(6)

C(19) C(20) 1.433(7)

C(20) C(21) 1.347(7)

C(21) C(22) 1.447(7)

C(22) N(23) 1.366(6)

C(22) C(24) 1.395(7)

C(24) C(55) 1.499(7)

C(25) C(26) 1.216(7)

C(26) Si(27) 1.865(6)

Si(27) C(30) 1.835(6)

Si(27) C(28) 1.855(5)

Si(27) C(29) 1.877(6)

C(31) C(32) 1.216(7)

C(32) Si(33) 1.854(6)

Si(33) C(35) 1.827(6)

Si(33) C(34) 1.838(6)

Si(33) C(36) 1.853(5)

C(37) C(38) 1.374(7)

C(37) C(42) 1.396(7)

C(38) C(39) 1.396(7)

C(39) C(40) 1.384(7)

C(40) C(41) 1.368(7)

C(41) C(42) 1.383(7)

C(43) C(44) 1.385(7)

C(43) C(48) 1.393(7)

C(44) C(45) 1.395(8)

C(45) C(46) 1.393(9)

C(46) C(47) 1.373(9)

C(47) C(48) 1.380(8)

C(49) C(54) 1.394(7)

C(49) C(50) 1.399(7)

C(50) C(51) 1.382(7)

C(51) C(52) 1.375(7)

C(52) C(53) 1.381(7)

C(53) C(54) 1.385(7)

C(55) C(56) 1.382(7)

C(55) C(60) 1.400(7)

C(56) C(57) 1.375(8)

C(57) C(58) 1.364(9)

C(58) C(59) 1.370(9)

C(59) C(60) 1.429(8)

**Table 30S**. Bond Angles for **4b**.

A B C Angle

C(2) N(1) C(5) 106.9(4)

N(1) C(2) C(24) 124.0(4)

N(1) C(2) C(3) 110.1(4)

C(24) C(2) C(3) 125.9(4)

C(4) C(3) C(2) 106.8(4)

C(4) C(3) C(25) 123.4(4)

C(2) C(3) C(25) 129.3(4)

C(3) C(4) C(31) 122.4(4)

C(3) C(4) C(5) 106.5(4)

C(31) C(4) C(5) 131.0(4)

N(1) C(5) C(6) 124.6(4)

N(1) C(5) C(4) 109.7(4)

C(6) C(5) C(4) 125.6(4)

C(5) C(6) C(7) 126.9(4)

C(5) C(6) C(37) 119.2(4)

C(7) C(6) C(37) 113.7(4)

N(11) C(7) C(6) 127.1(4)

N(11) C(7) C(8) 107.4(4)

C(6) C(7) C(8) 125.5(4)

C(9) C(8) C(7) 107.9(4)

C(8) C(9) C(10) 107.7(5)

N(11) C(10) C(12) 127.0(5)

N(11) C(10) C(9) 107.3(4)

C(12) C(10) C(9) 125.7(5)

C(7) N(11) C(10) 109.7(4)

C(10) C(12) C(13) 124.6(5)

C(10) C(12) C(43) 117.0(4)

C(13) C(12) C(43) 118.5(4)

N(17) C(13) C(12) 125.6(4)

N(17) C(13) C(14) 110.1(4)

C(12) C(13) C(14) 124.0(5)

C(15) C(14) C(13) 106.8(5)

C(14) C(15) C(16) 107.6(4)

N(17) C(16) C(18) 125.5(5)

N(17) C(16) C(15) 109.4(4)

C(18) C(16) C(15) 124.8(4)

C(13) N(17) C(16) 106.2(4)

C(19) C(18) C(16) 125.8(4)

C(19) C(18) C(49) 117.6(4)

C(16) C(18) C(49) 116.5(4)

N(23) C(19) C(18) 127.6(5)

N(23) C(19) C(20) 106.1(4)

C(18) C(19) C(20) 126.3(4)

C(21) C(20) C(19) 109.4(4)

C(20) C(21) C(22) 107.2(5)

N(23) C(22) C(24) 127.7(4)

N(23) C(22) C(21) 107.0(4)

C(24) C(22) C(21) 125.3(5)

C(22) N(23) C(19) 110.4(4)

C(22) C(24) C(2) 125.9(5)

C(22) C(24) C(55) 116.8(4)

C(2) C(24) C(55) 117.2(4)

C(26) C(25) C(3) 175.4(5)

C(25) C(26) Si(27) 176.2(5)

C(30) Si(27) C(28) 109.1(3)

C(30) Si(27) C(26) 108.6(3)

C(28) Si(27) C(26) 110.7(3)

C(30) Si(27) C(29) 111.2(3)

C(28) Si(27) C(29) 108.5(3)

C(26) Si(27) C(29) 108.7(3)

C(32) C(31) C(4) 176.4(6)

C(31) C(32) Si(33) 174.8(5)

C(35) Si(33) C(34) 108.7(3)

C(35) Si(33) C(36) 111.4(3)

C(34) Si(33) C(36) 111.0(3)

C(35) Si(33) C(32) 105.3(3)

C(34) Si(33) C(32) 109.1(3)

C(36) Si(33) C(32) 111.3(3)

C(38) C(37) C(42) 118.5(5)

C(38) C(37) C(6) 122.2(4)

C(42) C(37) C(6) 119.2(4)

C(37) C(38) C(39) 121.0(5)

C(40) C(39) C(38) 119.5(5)

C(41) C(40) C(39) 120.0(5)

C(40) C(41) C(42) 120.4(5)

C(41) C(42) C(37) 120.6(5)

C(44) C(43) C(48) 119.2(5)

C(44) C(43) C(12) 121.6(5)

C(48) C(43) C(12) 119.2(5)

C(43) C(44) C(45) 121.0(6)

C(46) C(45) C(44) 119.1(6)

C(47) C(46) C(45) 119.7(6)

C(46) C(47) C(48) 121.4(6)

C(47) C(48) C(43) 119.7(6)

C(54) C(49) C(50) 117.6(4)

C(54) C(49) C(18) 119.7(4)

C(50) C(49) C(18) 122.7(4)

C(51) C(50) C(49) 120.7(5)

C(52) C(51) C(50) 120.9(5)

C(51) C(52) C(53) 119.4(5)

C(52) C(53) C(54) 120.1(5)

C(53) C(54) C(49) 121.3(5)

C(56) C(55) C(60) 118.3(5)

C(56) C(55) C(24) 120.0(5)

C(60) C(55) C(24) 121.7(5)

C(57) C(56) C(55) 121.7(6)

C(58) C(57) C(56) 121.3(6)

C(57) C(58) C(59) 118.9(6)

C(58) C(59) C(60) 121.1(6)

C(55) C(60) C(59) 118.7(6)
